# Supplementary material for: Design, synthesis and bioactivity evaluation of novel quinazoline based KRASG12C inhibitors
Source: Royal Society of Chemistry journal article supplement (doi:10.1039/d1nj06226c), 2022-01-01

## DESIGN, SYNTHESIS AND BIOACTIVITY EVALUATION OF NOVEL QUINAZOLINE BASED KRAS<sup>G12C</sup> INHIBITORS

Qingxu Liu<sup>a</sup>, Yan Li<sup>abc</sup>, Ying Zhi<sup>abc</sup>, Bo Liu<sup>abc</sup>, Jingyong Sun<sup>abc\*</sup>

<sup>a</sup> Institute of Materia Medica, Shandong First Medical University & Shandong Academy of Medical Sciences, Jinan 250117, China;

<sup>b</sup> Key Laboratory for Biotech-Drugs Ministry of Health, Jinan 250117, China;

<sup>c</sup> Key Laboratory for Rare & Uncommon Diseases of Shandong Province, Jinan 250117, China;

\* Corresponding author. E-mail address: sunjingyong08@hotmail.com (Jingyong Sun)

## Supporting Information

### Contents

|                                                             |    |
|-------------------------------------------------------------|----|
| <b>IR(KBr) of compounds 7a-8q</b> .....                     | 2  |
| <b>Mass spectra of compounds 7a-8q</b> .....                | 11 |
| <b><sup>1</sup>H NMR(600 MHz) of compounds 7a-8q</b> .....  | 16 |
| <b><sup>13</sup>C NMR(150 MHz) of compounds 7a-8q</b> ..... | 30 |

## IR(KBr) of compounds

For compound **7a**, IR spectra were recorded on a Thermo Nicolet Nexus 670 FT-IR spectrometer:

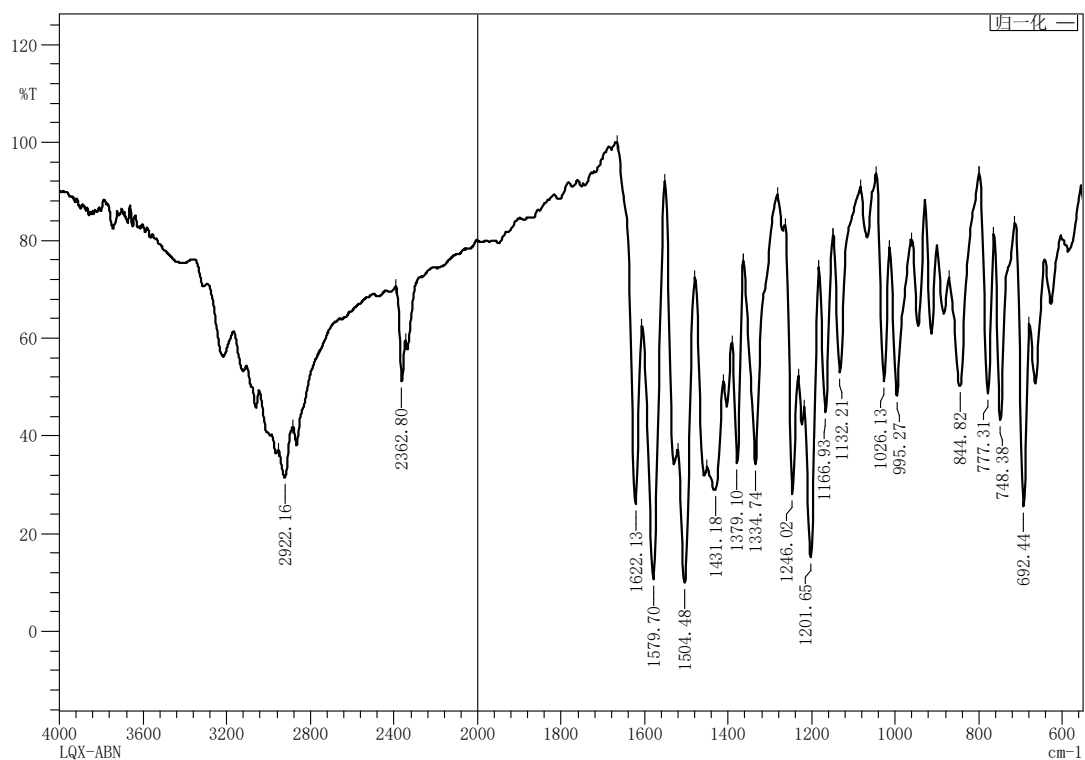

For compound **7b**, IR spectra were recorded on a Thermo Nicolet Nexus 670 FT-IR spectrometer:

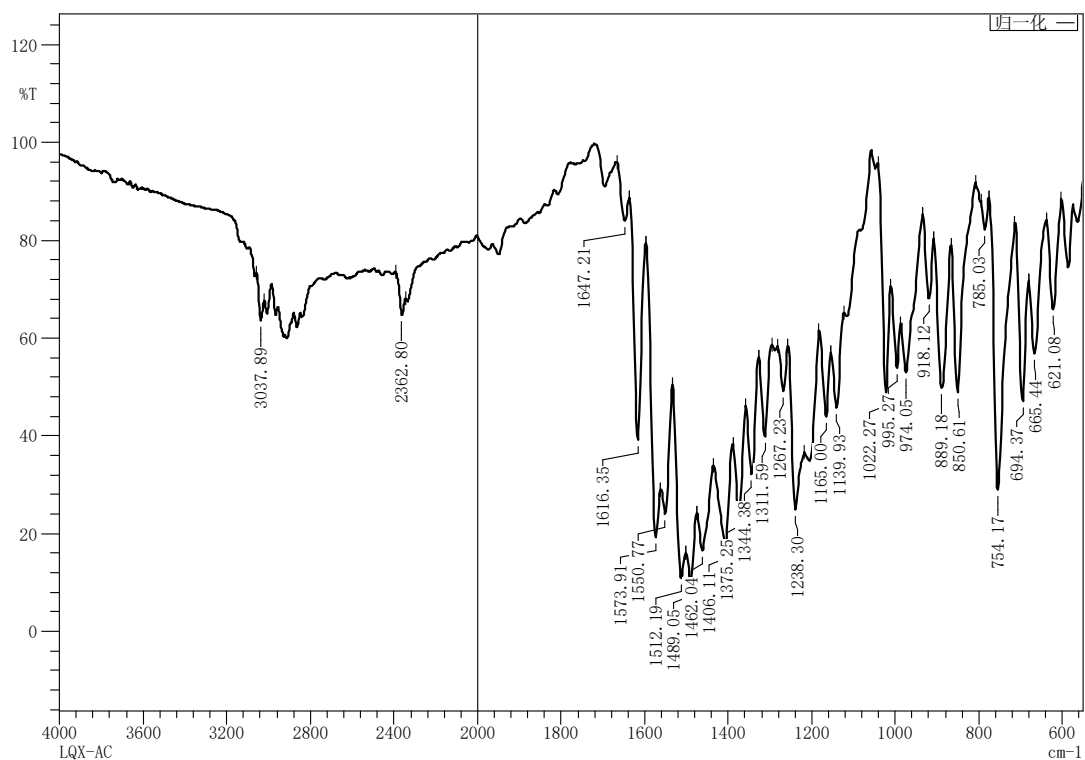

For compound **7c**, IR spectra were recorded on a Thermo Nicolet Nexus 670 FT-IR spectrometer:

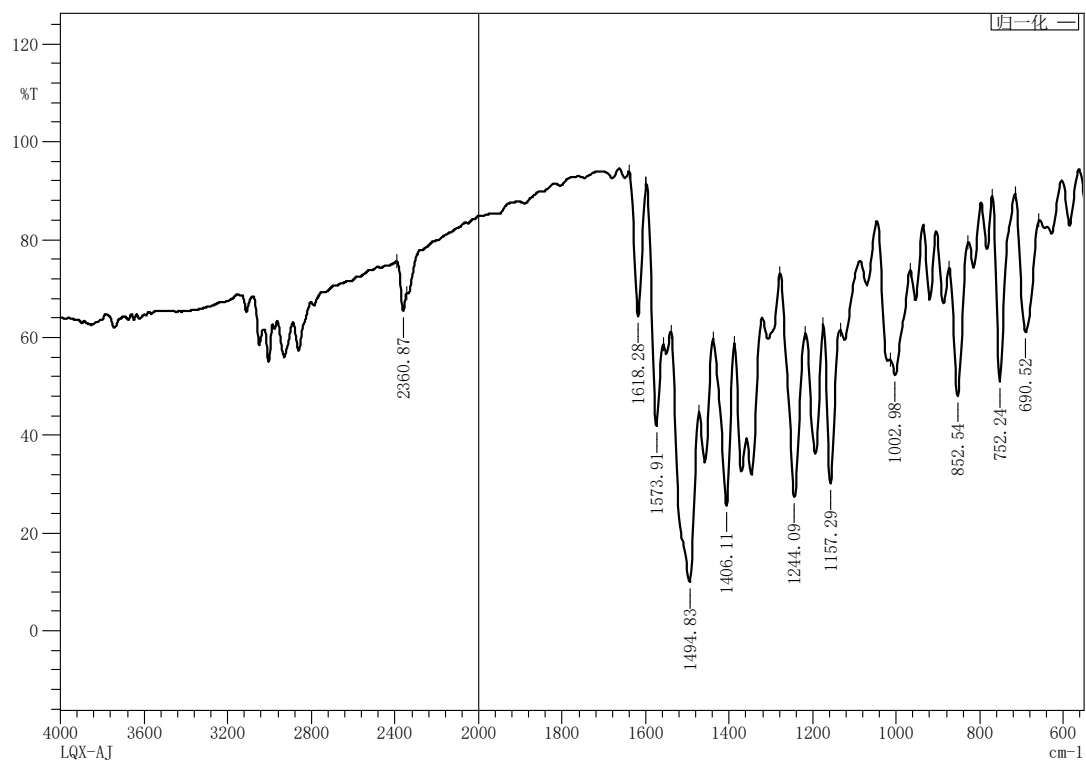

For compound **8a**, IR spectra were recorded on a Thermo Nicolet Nexus 670 FT-IR spectrometer:

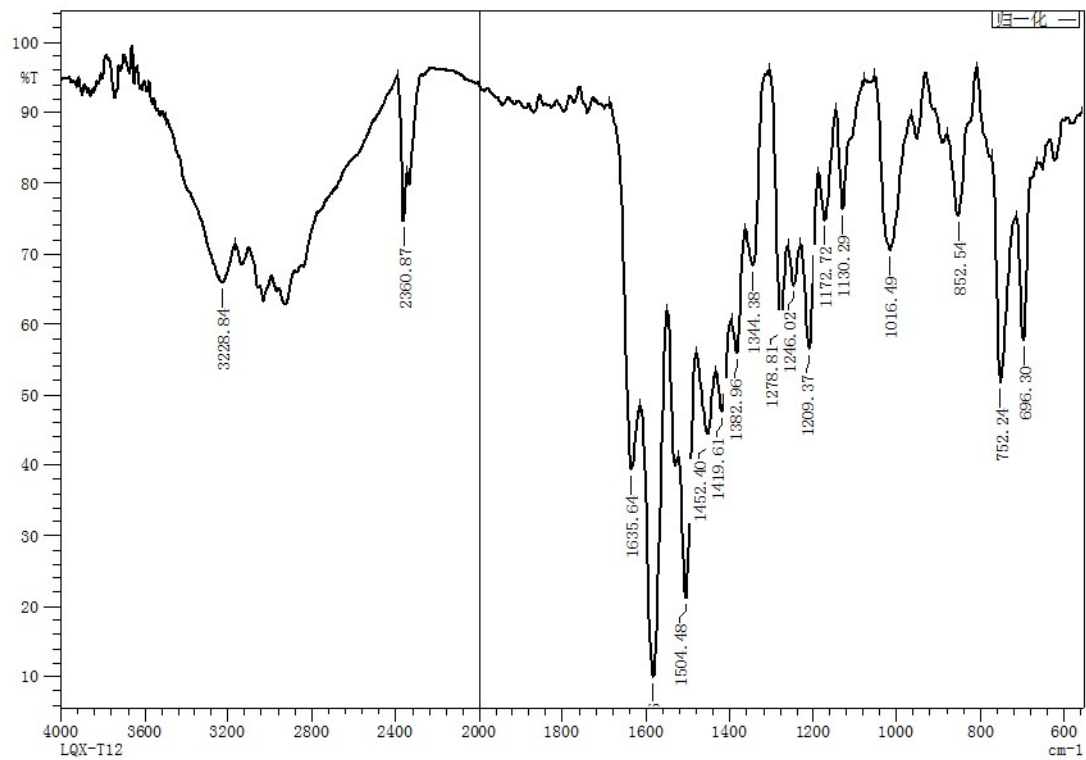

For compound **8b**, IR spectra were recorded on a Thermo Nicolet Nexus 670 FT-IR spectrometer:

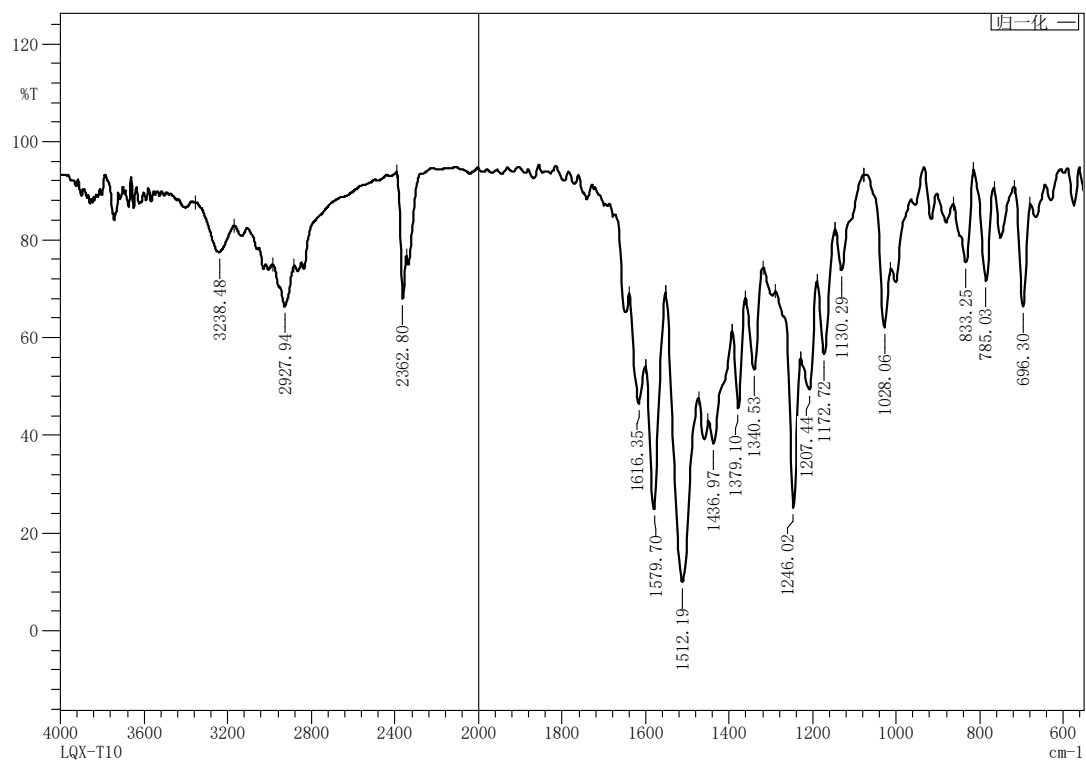

For compound **8c**, IR spectra were recorded on a Thermo Nicolet Nexus 670 FT-IR spectrometer:

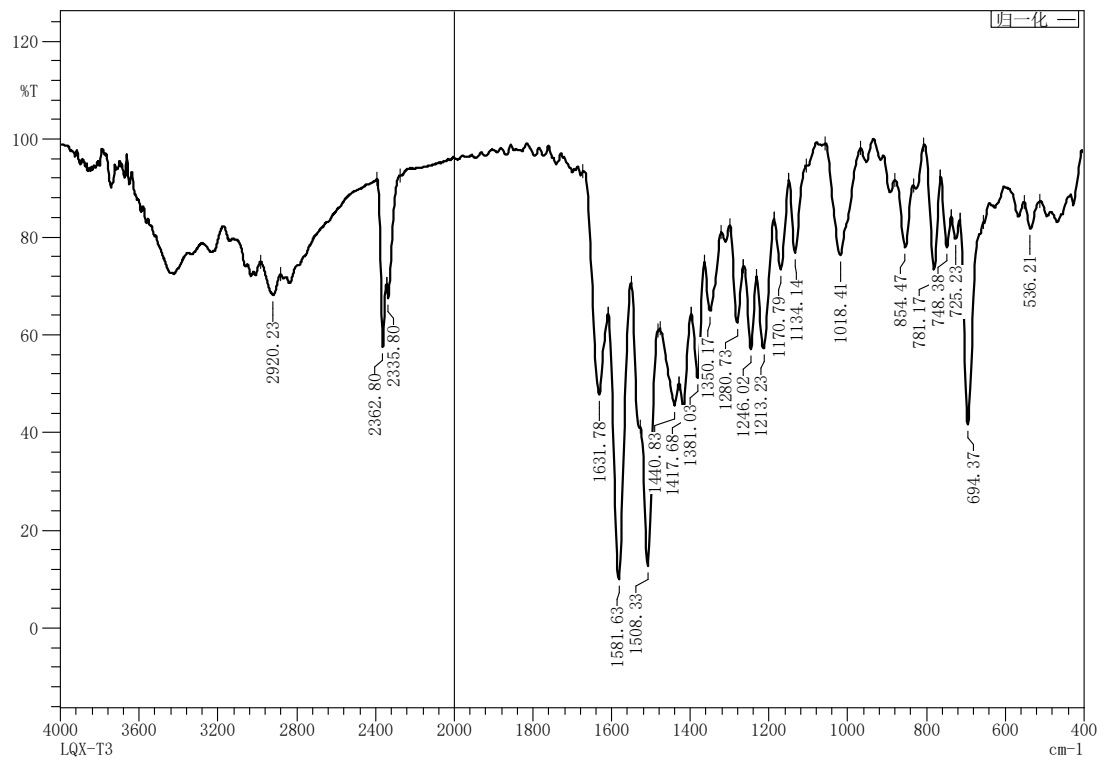



For compound **8d**, IR spectra were recorded on a Thermo Nicolet Nexus 670 FT-IR spectrometer:

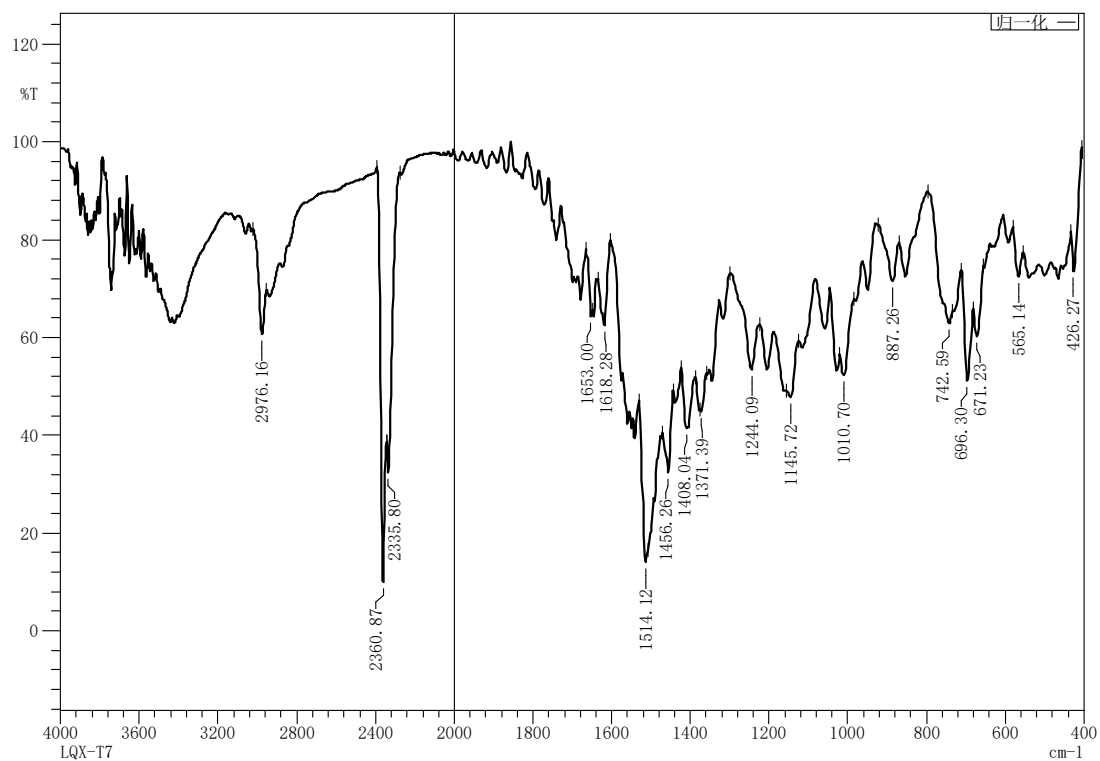

For compound **8e**, IR spectra were recorded on a Thermo Nicolet Nexus 670 FT-IR spectrometer:

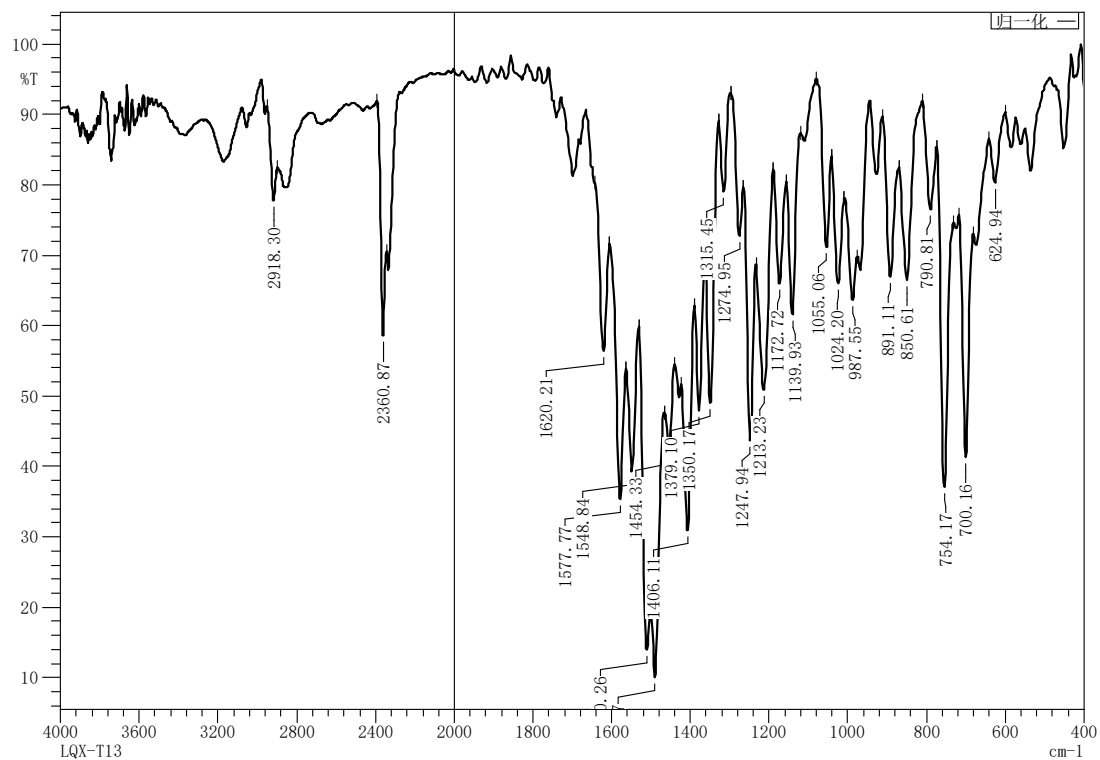

For compound **8f**, IR spectra were recorded on a Thermo Nicolet Nexus 670 FT-IR spectrometer:

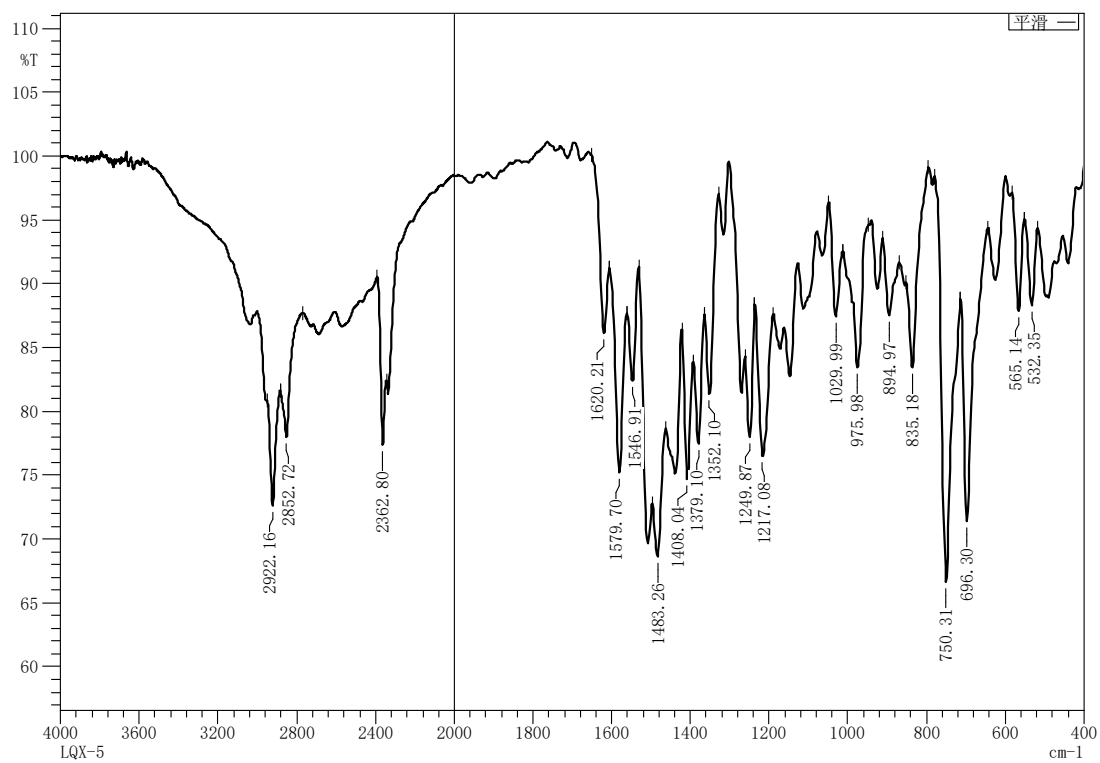

For compound **8g**, IR spectra were recorded on a Thermo Nicolet Nexus 670 FT-IR spectrometer:

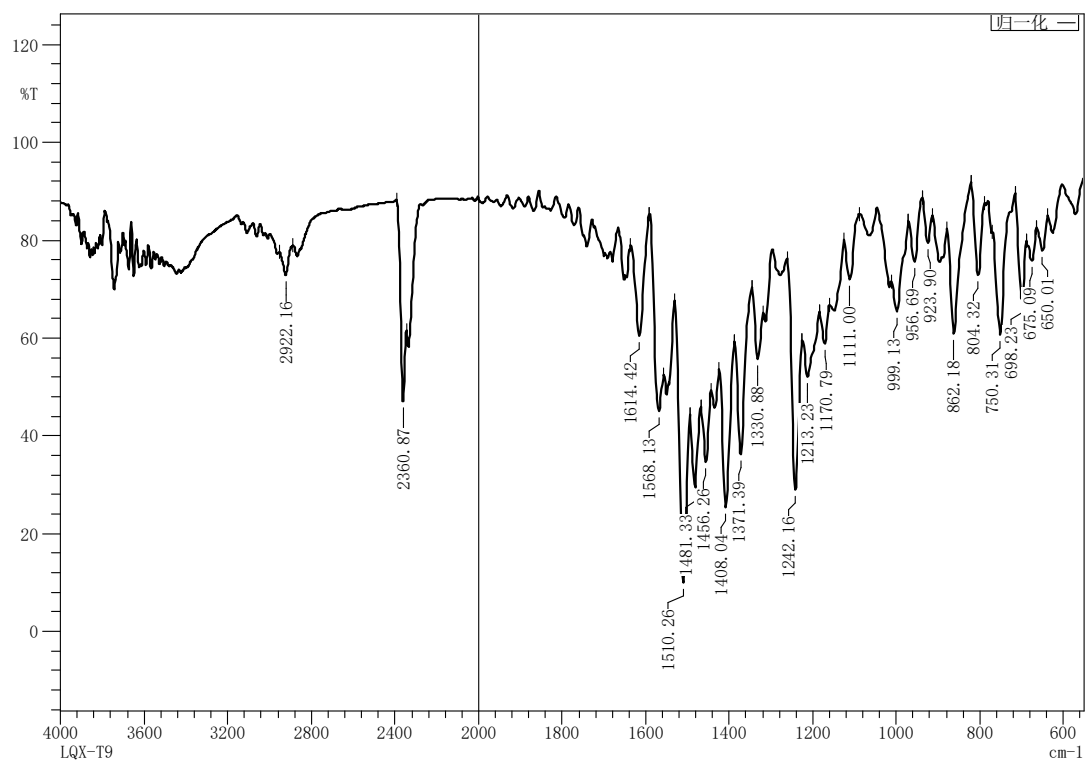

For compound **8h**, IR spectra were recorded on a Thermo Nicolet Nexus 670 FT-IR spectrometer:

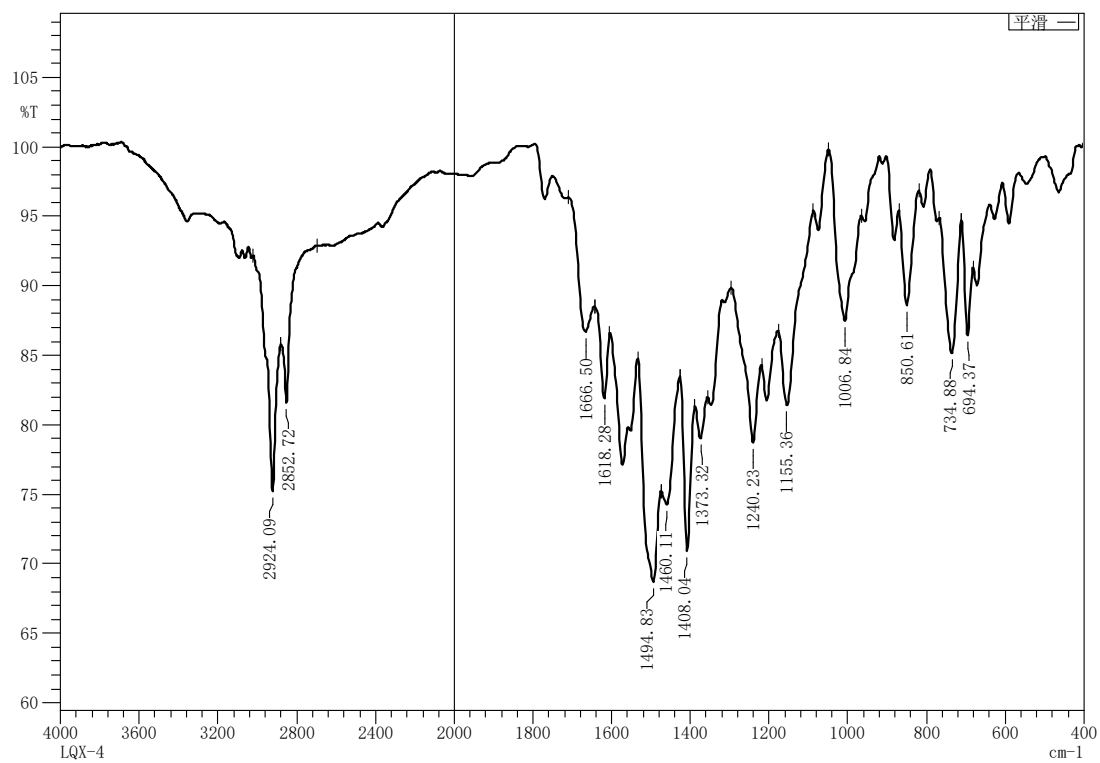

For compound **8i**, IR spectra were recorded on a Thermo Nicolet Nexus 670 FT-IR spectrometer:

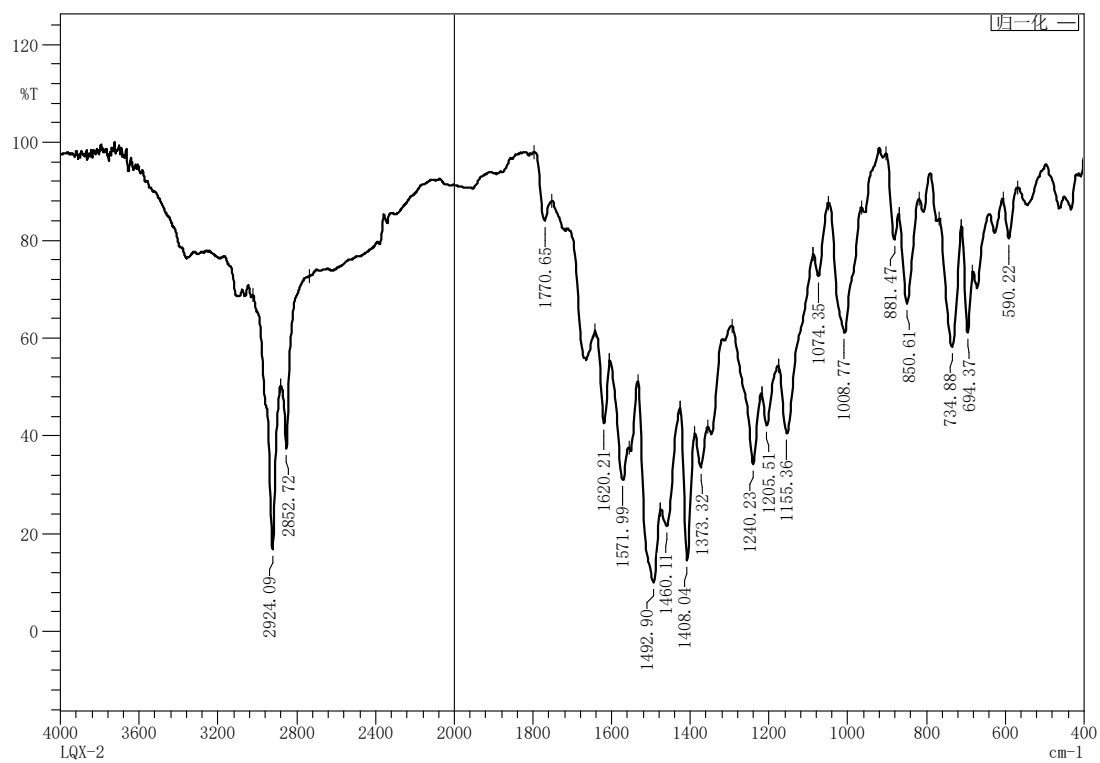

For compound **8j**, IR spectra were recorded on a Thermo Nicolet Nexus 670 FT-IR spectrometer:

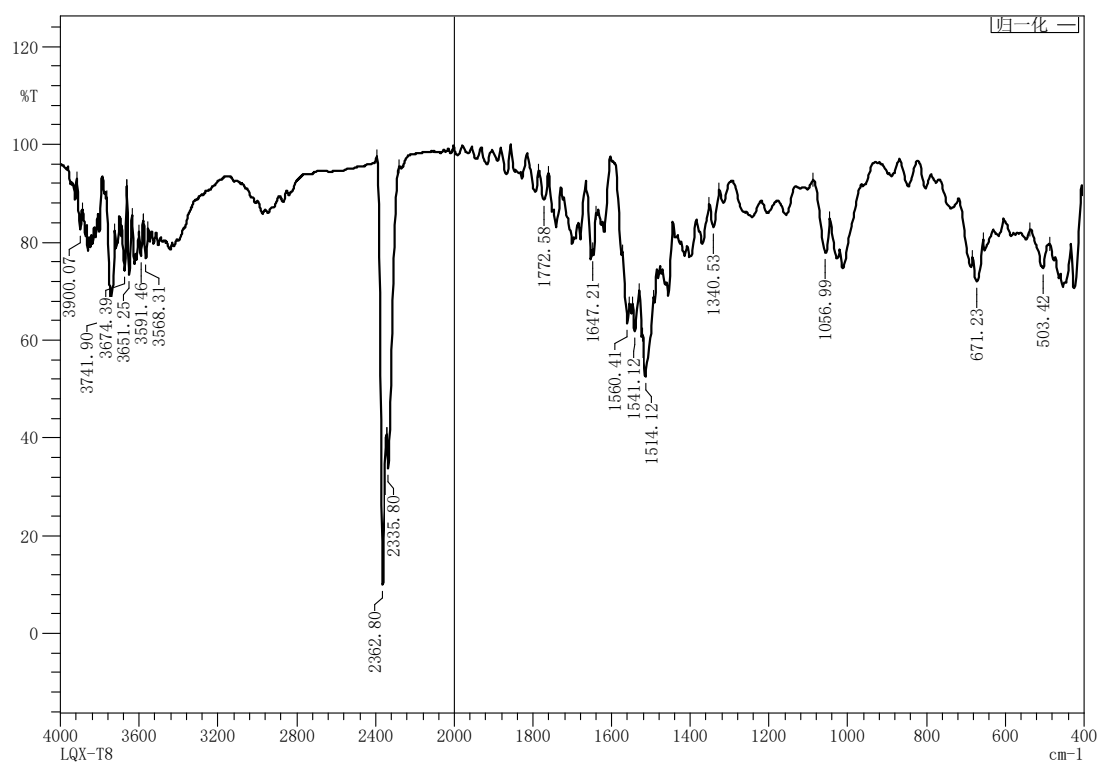

For compound **8k**, IR spectra were recorded on a Thermo Nicolet Nexus 670 FT-IR spectrometer:

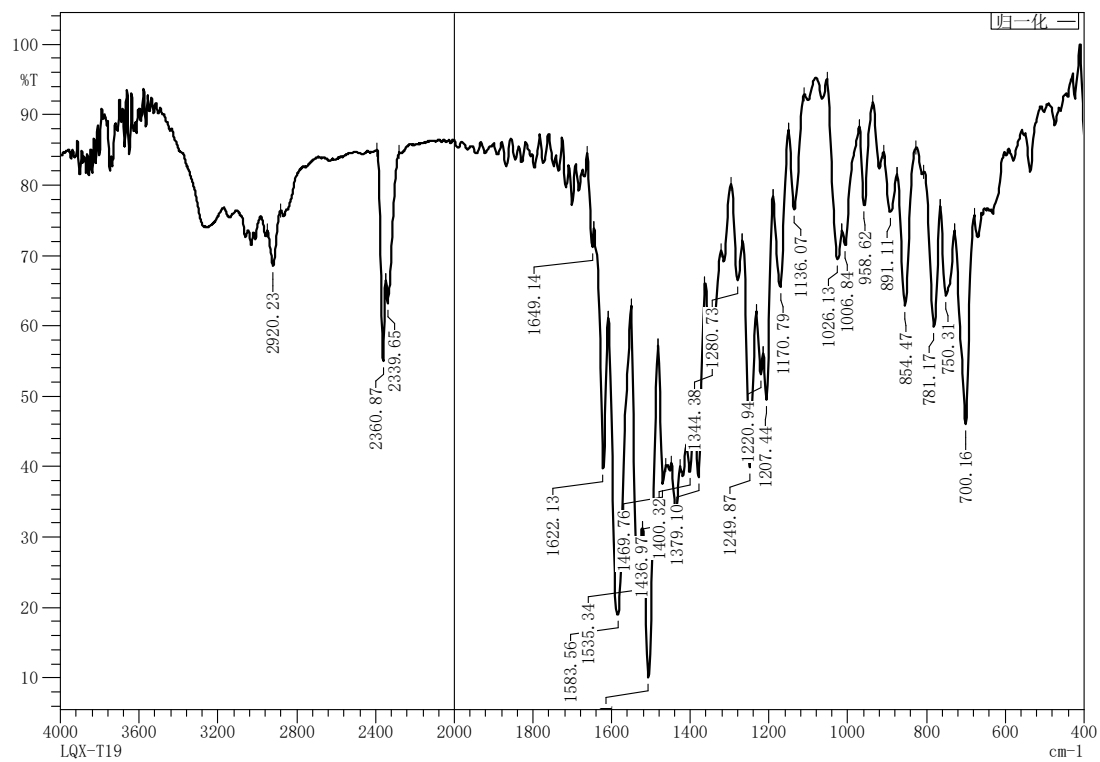

For compound **8l**, IR spectra were recorded on a Thermo Nicolet Nexus 670 FT-IR spectrometer:

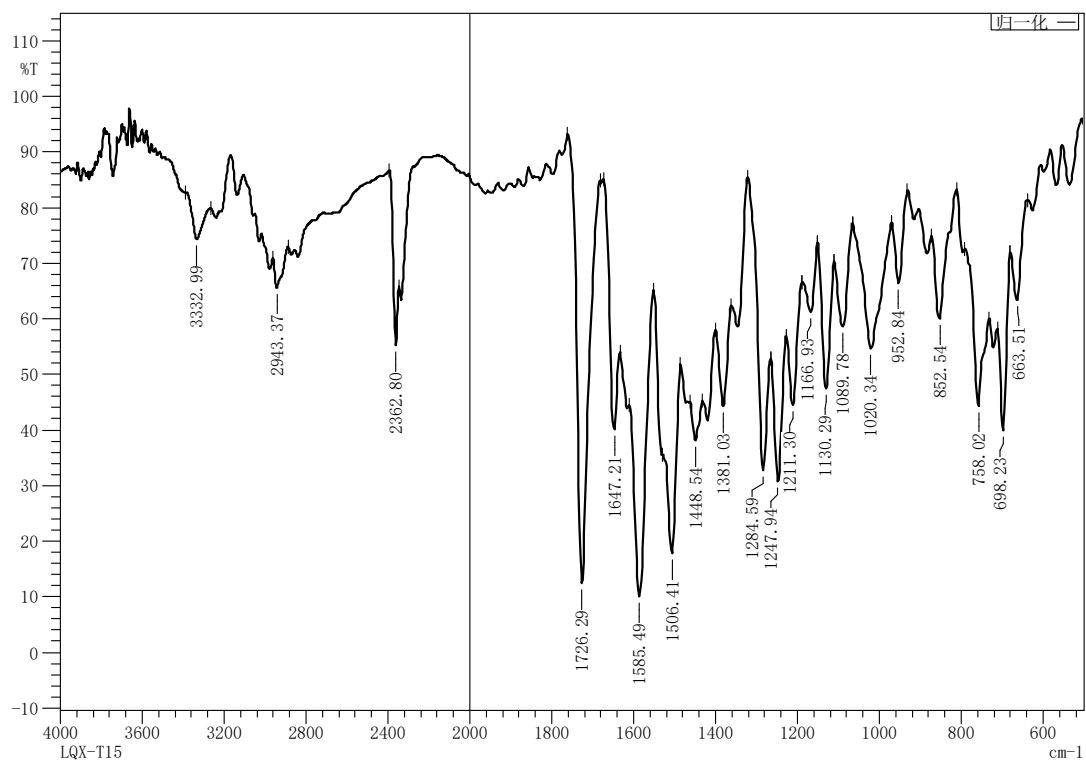

For compound **8m**, IR spectra were recorded on a Thermo Nicolet Nexus 670 FT-IR spectrometer:

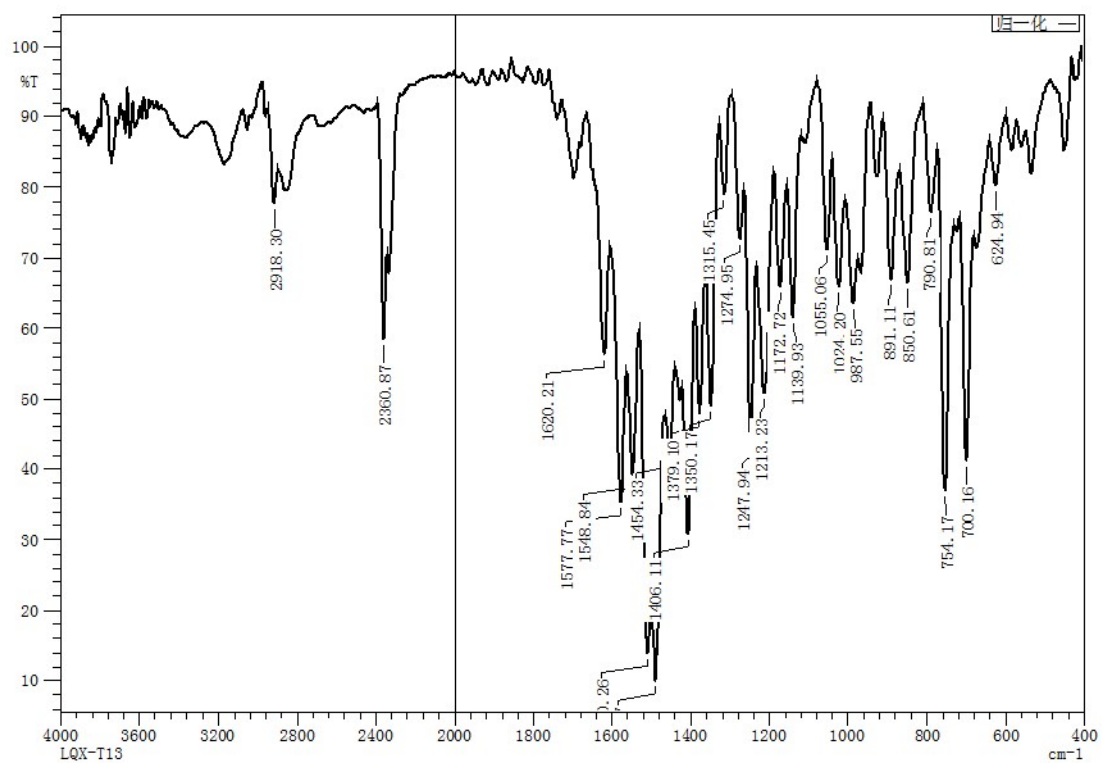

For compound **8n**, IR spectra were recorded on a Thermo Nicolet Nexus 670 FT-IR spectrometer:

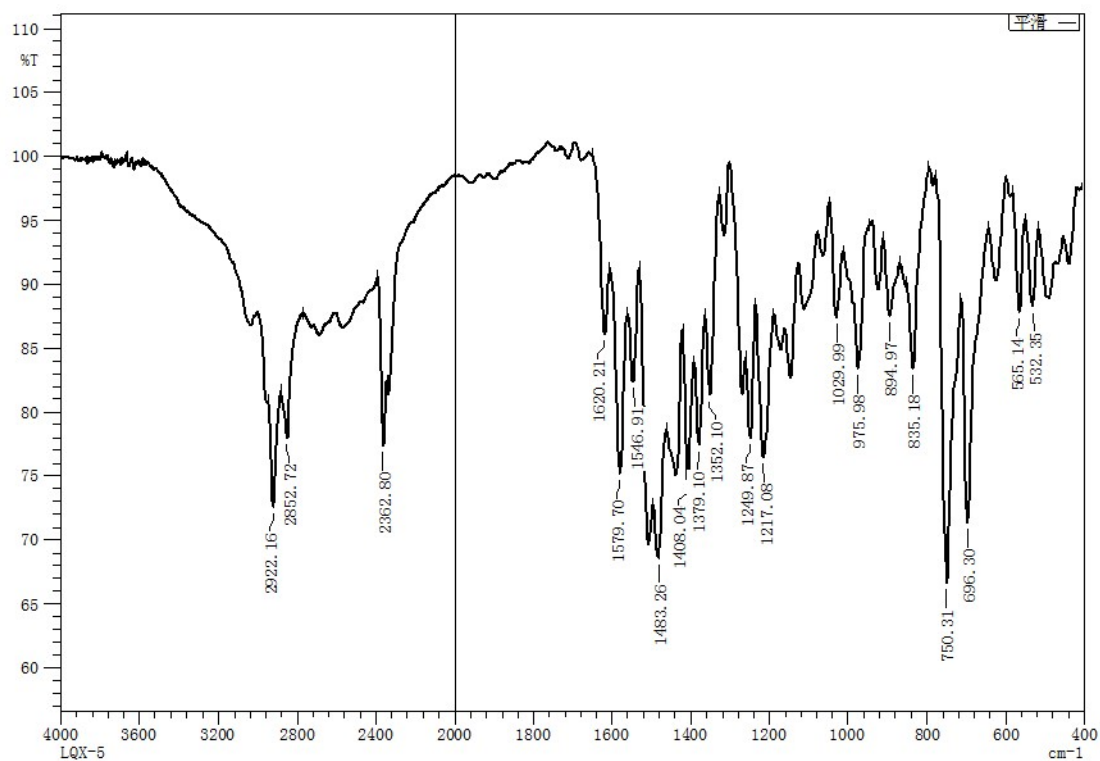

For compound **8o**, IR spectra were recorded on a Thermo Nicolet Nexus 670 FT-IR spectrometer:

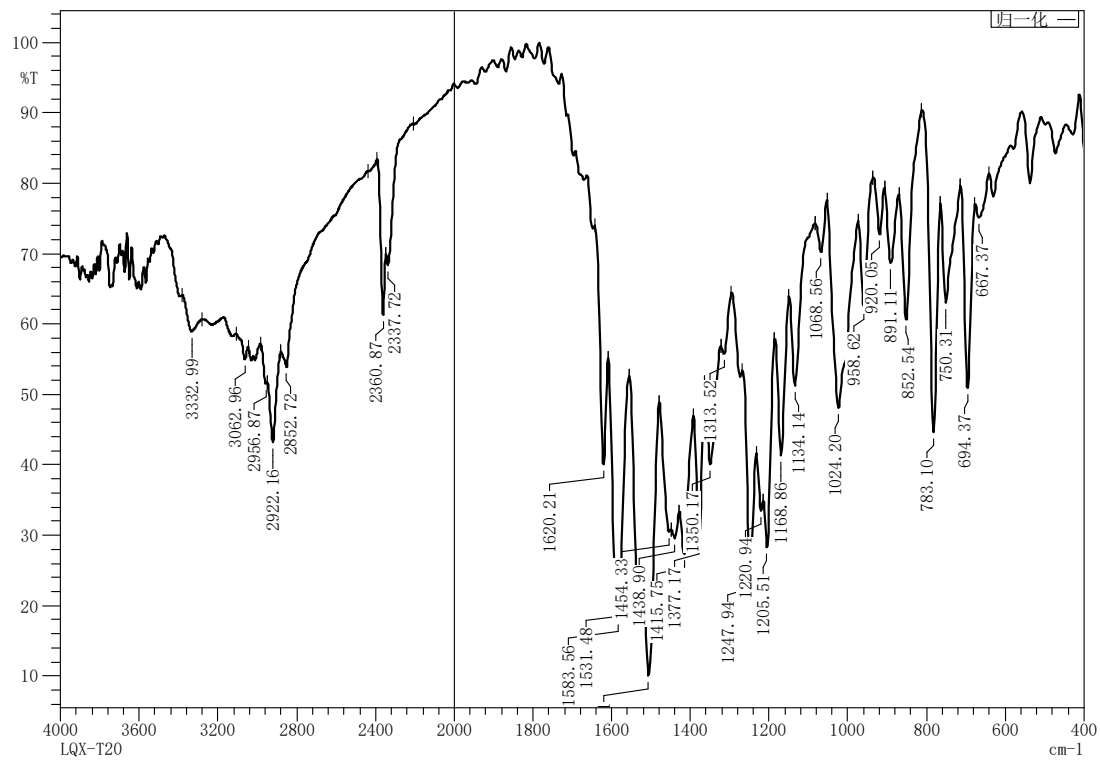

For compound **8p**, IR spectra were recorded on a Thermo Nicolet Nexus 670 FT-IR spectrometer:



For compound **8q**, IR spectra were recorded on a Thermo Nicolet Nexus 670 FT-IR spectrometer:

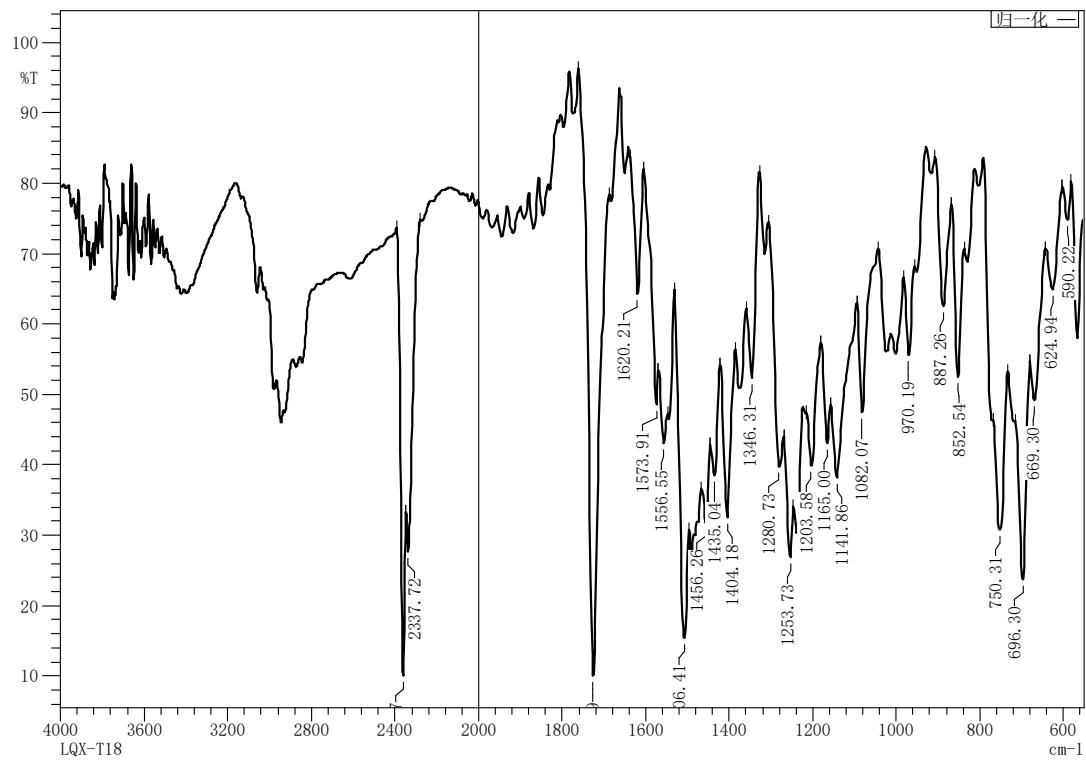

## Mass spectra of compounds

ESI mass spectrum of compound **1** recorded on an AGILENT 1200 Capillary spectrometer:

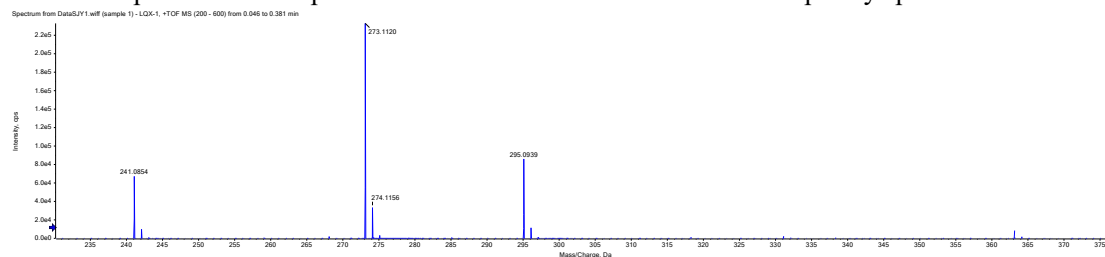

ESI mass spectrum of compound **2** recorded on an AGILENT 1200 Capillary spectrometer:

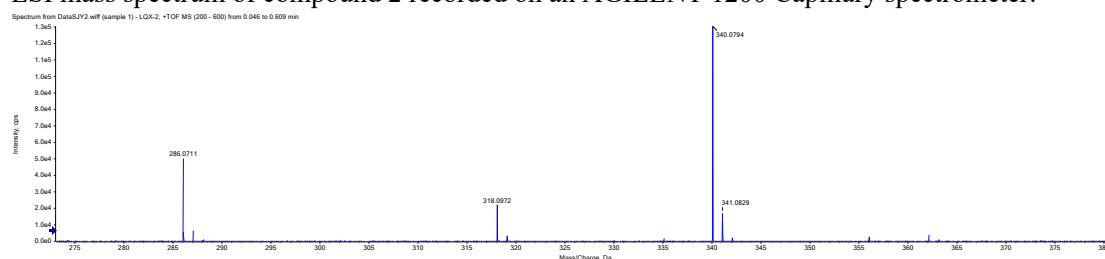

ESI mass spectrum of compound **3** recorded on an AGILENT 1200 Capillary spectrometer:

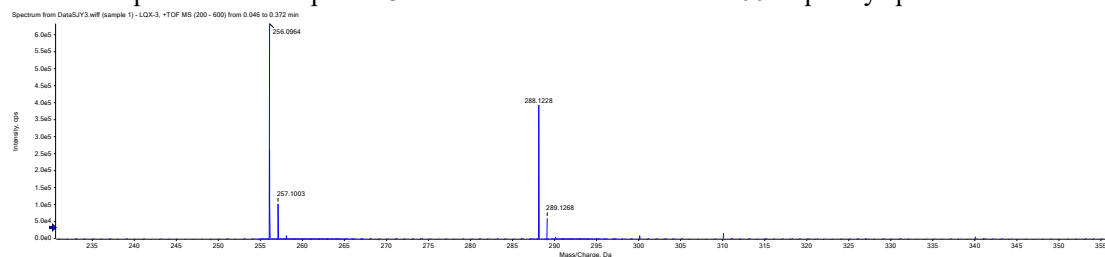

ESI mass spectrum of compound **4** recorded on an AGILENT 1200 Capillary spectrometer:

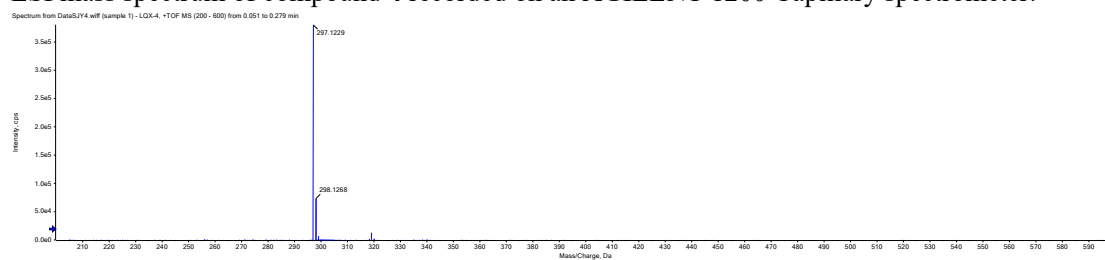

ESI mass spectrum of compound **5** recorded on an AGILENT 1200 Capillary spectrometer:

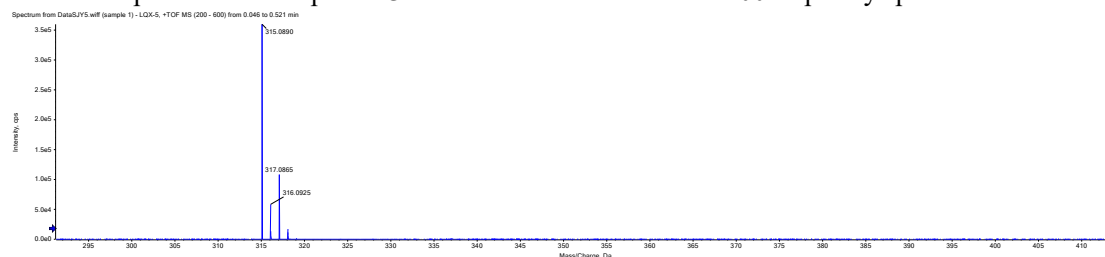

ESI mass spectrum of compound **6** recorded on an AGILENT 1200 Capillary spectrometer:



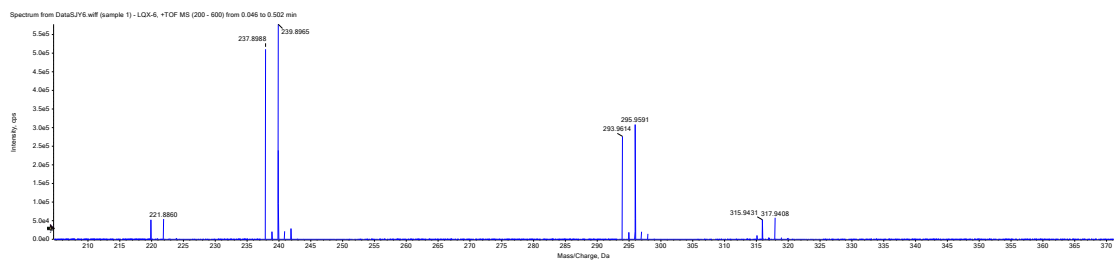

ESI mass spectrum of compound **7a** recorded on an AGILENT 1200 Capillary spectrometer:

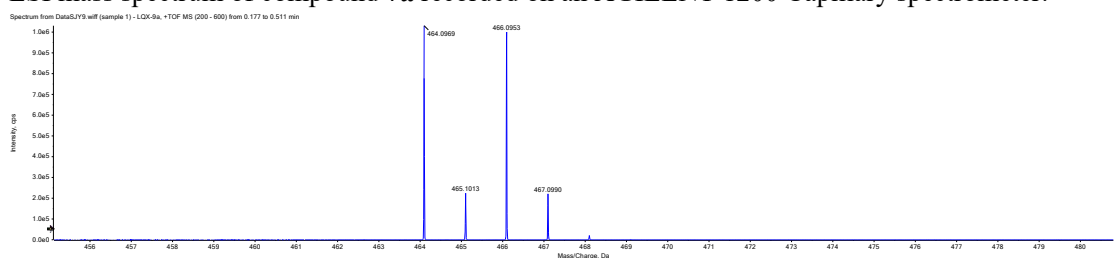

ESI mass spectrum of compound **7b** recorded on an AGILENT 1200 Capillary spectrometer:

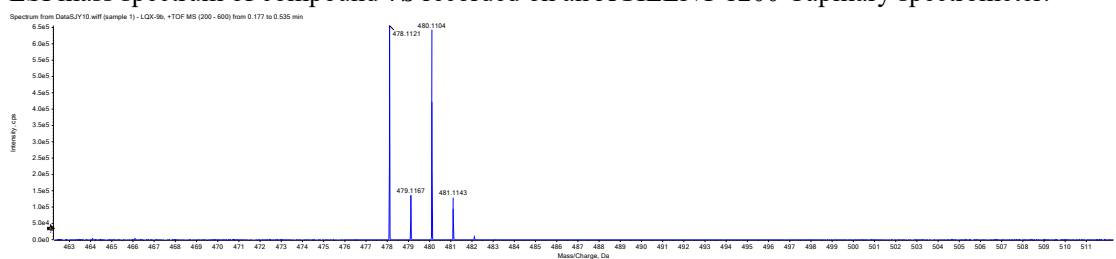

ESI mass spectrum of compound **7c** recorded on an AGILENT 1200 Capillary spectrometer:

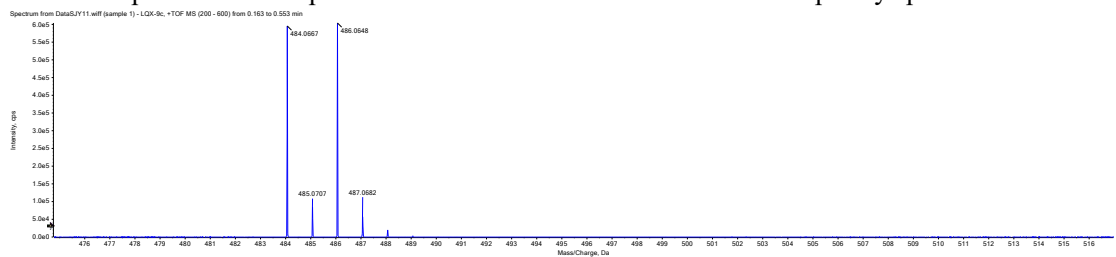

ESI mass spectrum of compound **8a** recorded on an AGILENT 1200 Capillary spectrometer:

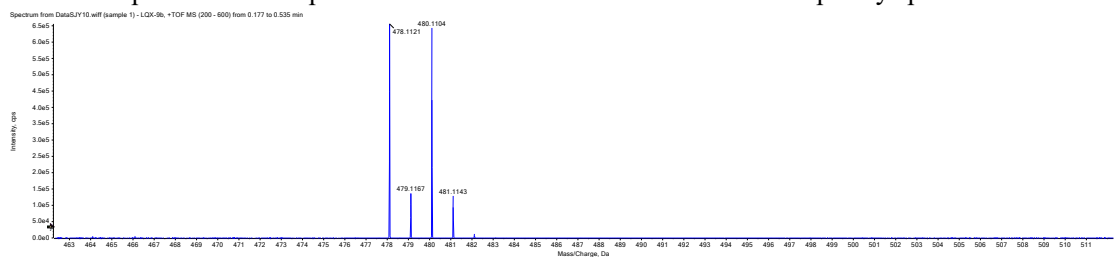

ESI mass spectrum of compound **8b** recorded on an AGILENT 1200 Capillary spectrometer:

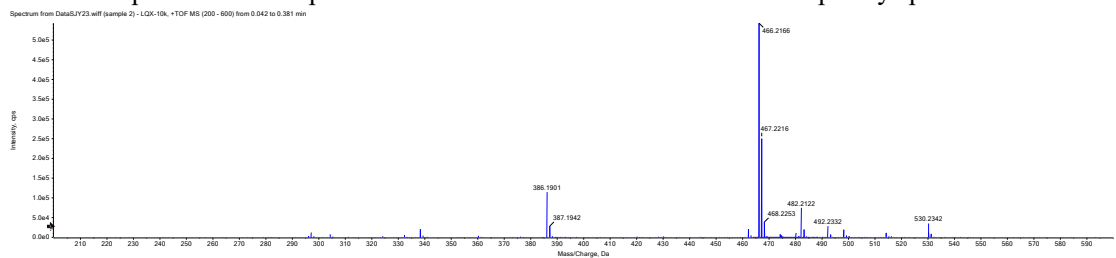

ESI mass spectrum of compound **8c** recorded on an AGILENT 1200 Capillary spectrometer:

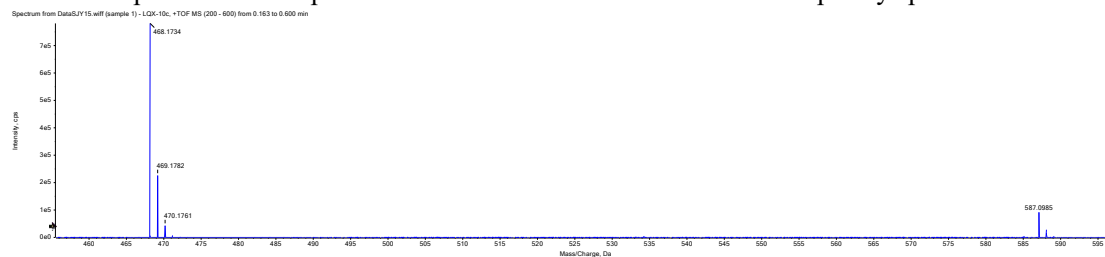

ESI mass spectrum of compound **8d** recorded on an AGILENT 1200 Capillary spectrometer:

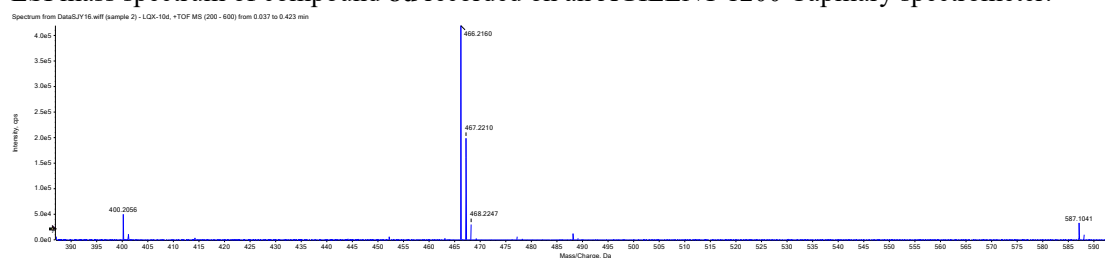

ESI mass spectrum of compound **8e** recorded on an AGILENT 1200 Capillary spectrometer:

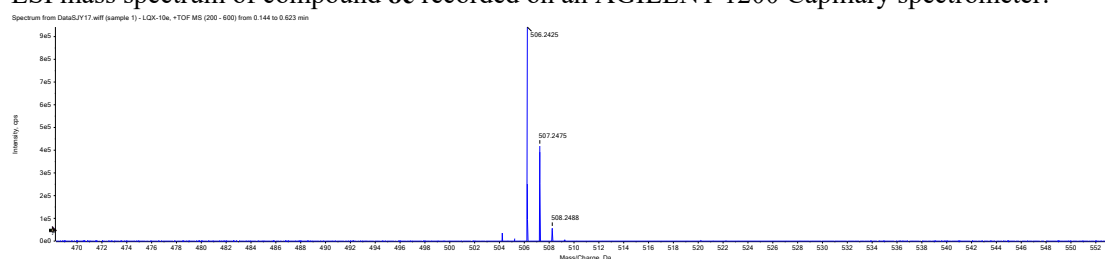

ESI mass spectrum of compound **8f** recorded on an AGILENT 1200 Capillary spectrometer:

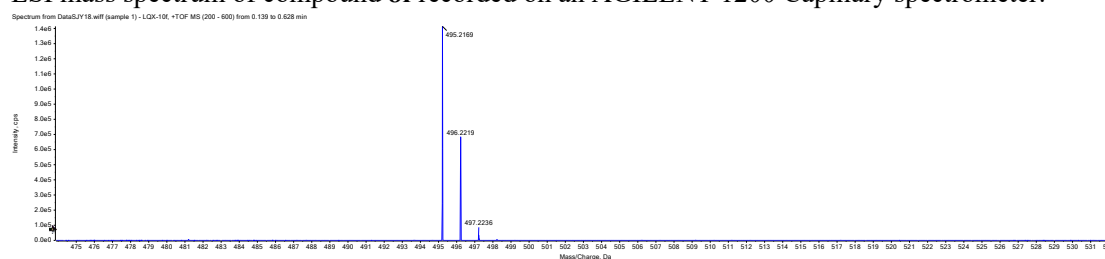

ESI mass spectrum of compound **8g** recorded on an AGILENT 1200 Capillary spectrometer:

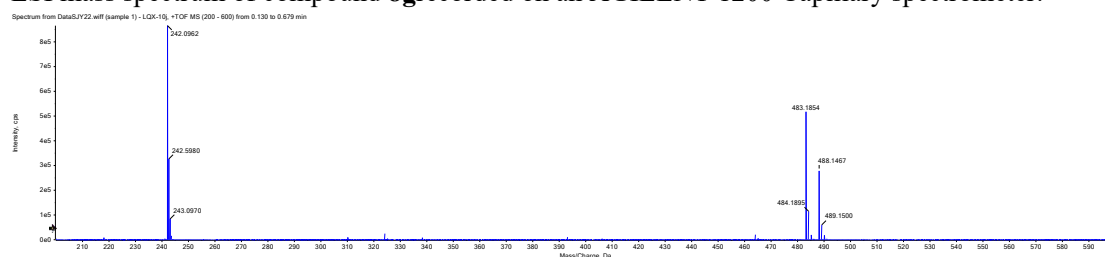

ESI mass spectrum of compound **8h** recorded on an AGILENT 1200 Capillary spectrometer:

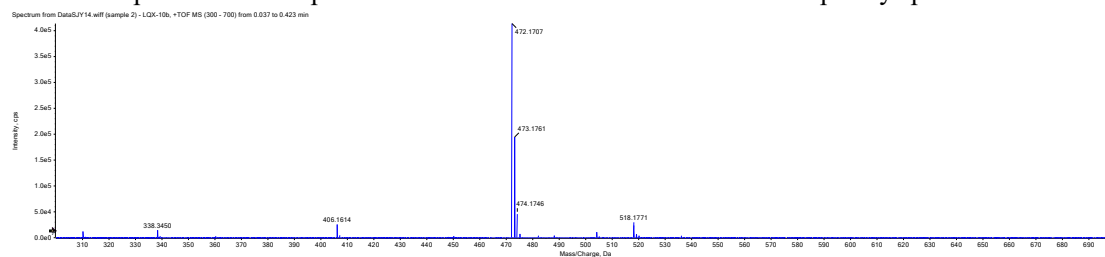

### ESI mass spectrum of compound **8i** recorded on an AGILENT 1200 Capillary spectrometer:

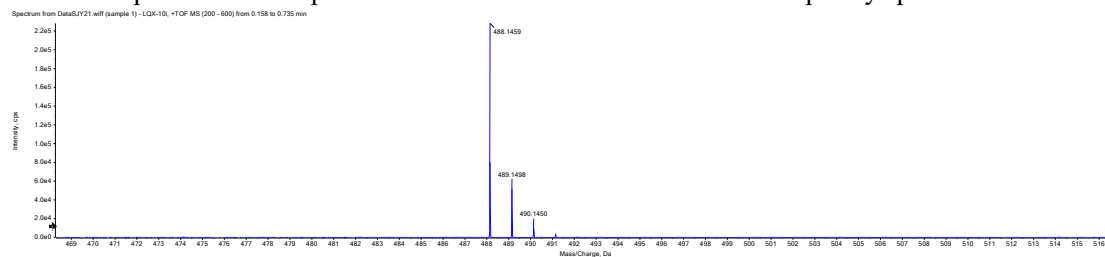

### ESI mass spectrum of compound **8j** recorded on an AGILENT 1200 Capillary spectrometer:

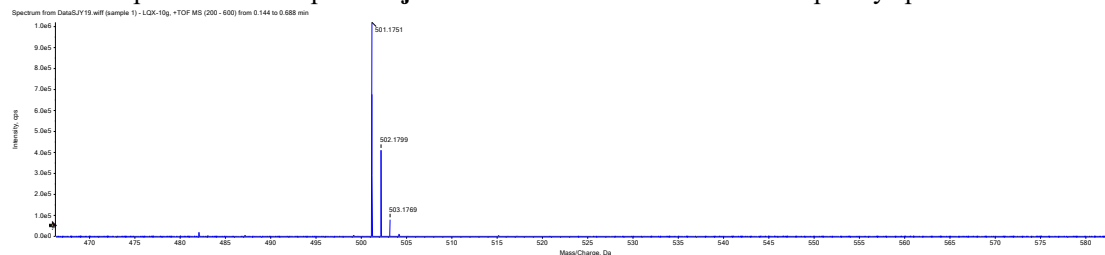

### ESI mass spectrum of compound **8k** recorded on an AGILENT 1200 Capillary spectrometer:

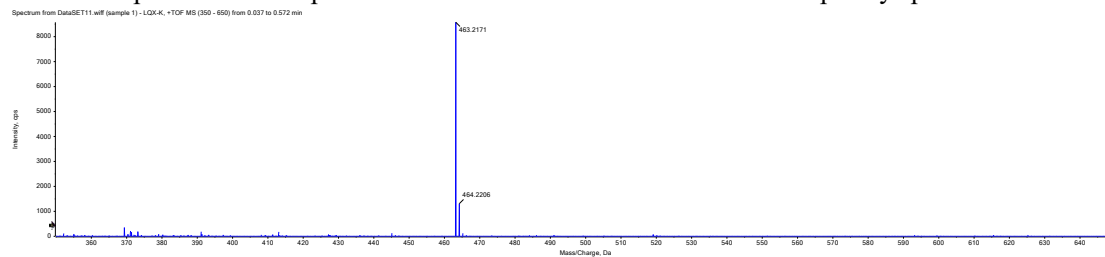

### ESI mass spectrum of compound **8l** recorded on an AGILENT 1200 Capillary spectrometer:

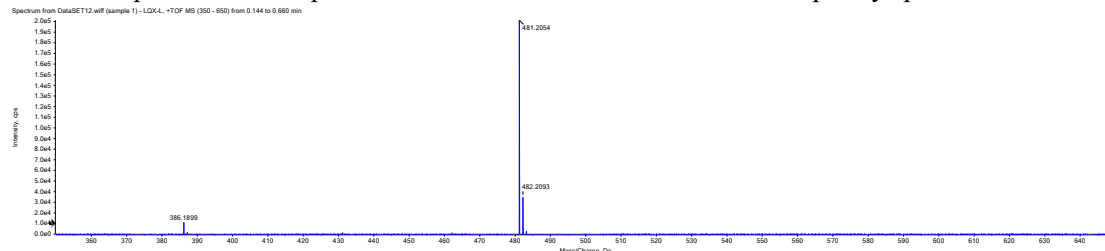

### ESI mass spectrum of compound **8m** recorded on an AGILENT 1200 Capillary spectrometer:

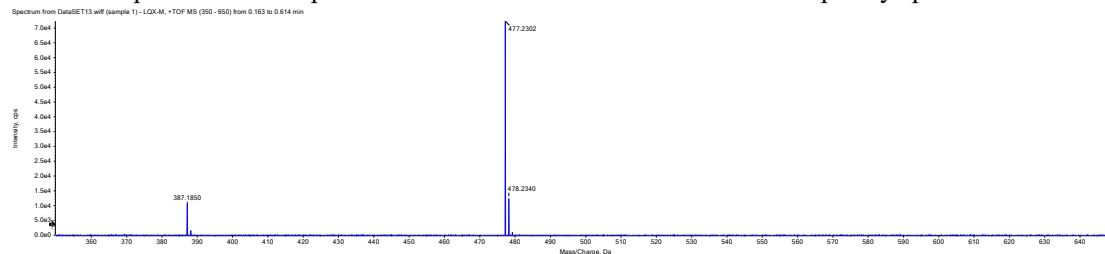

ESI mass spectrum of compound **8n** recorded on an AGILENT 1200 Capillary spectrometer:

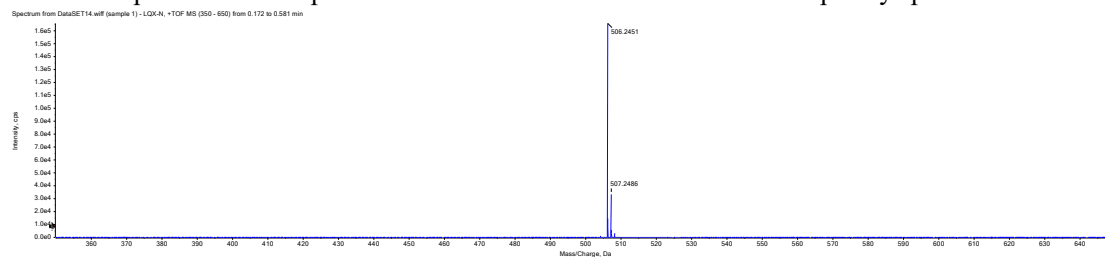

ESI mass spectrum of compound **8o** recorded on an AGILENT 1200 Capillary spectrometer:

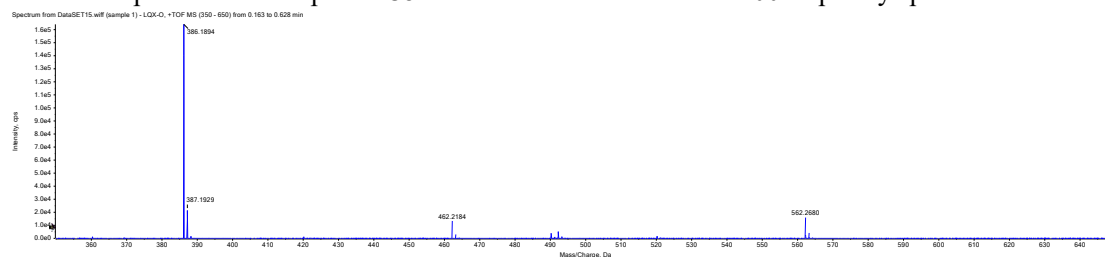

ESI mass spectrum of compound **8p** recorded on an AGILENT 1200 Capillary spectrometer:

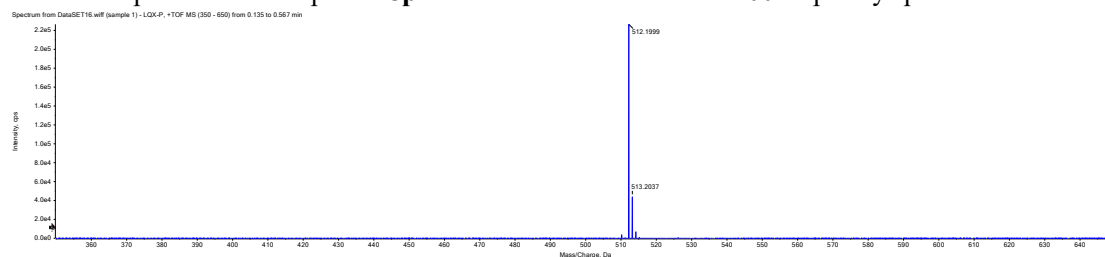

ESI mass spectrum of compound **8q** recorded on an AGILENT 1200 Capillary spectrometer:

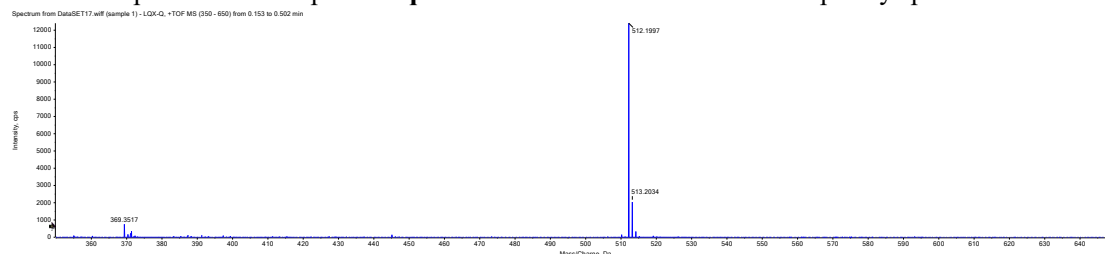

# <sup>1</sup>H NMR (600MHz) of compounds

## <sup>1</sup>H NMR of compound 1

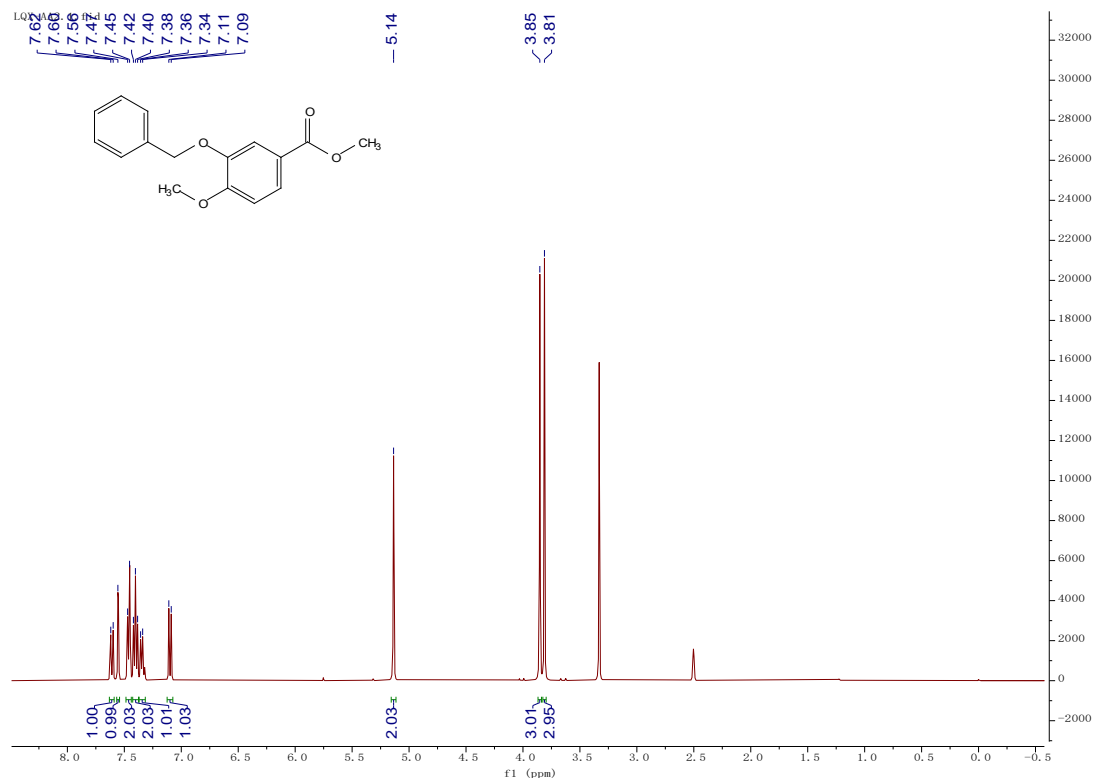

## <sup>1</sup>H NMR of compound 2

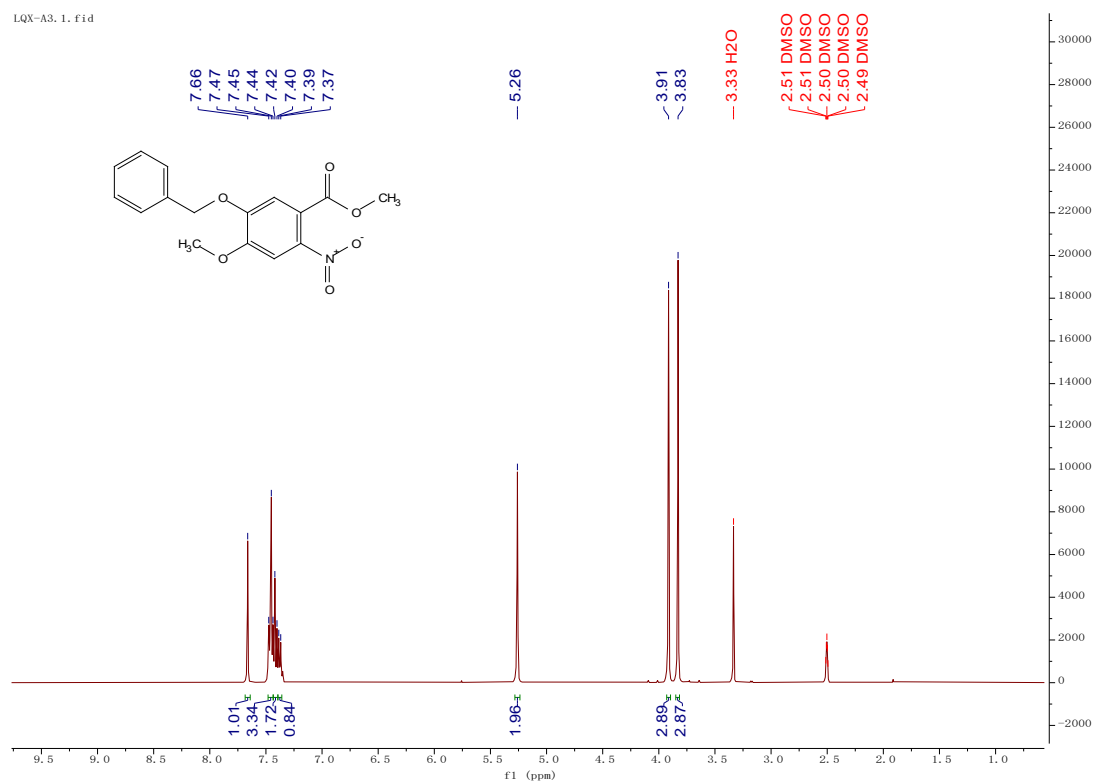

### <sup>1</sup>H NMR of compound 3

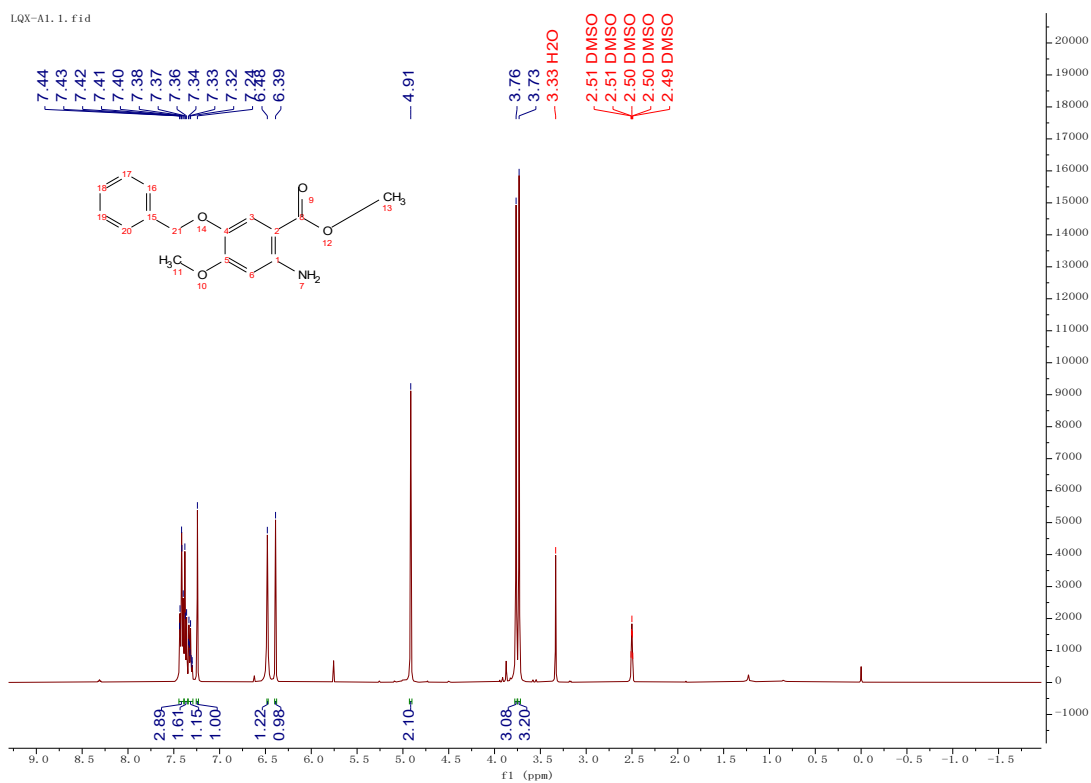

### <sup>1</sup>H NMR of compound 5

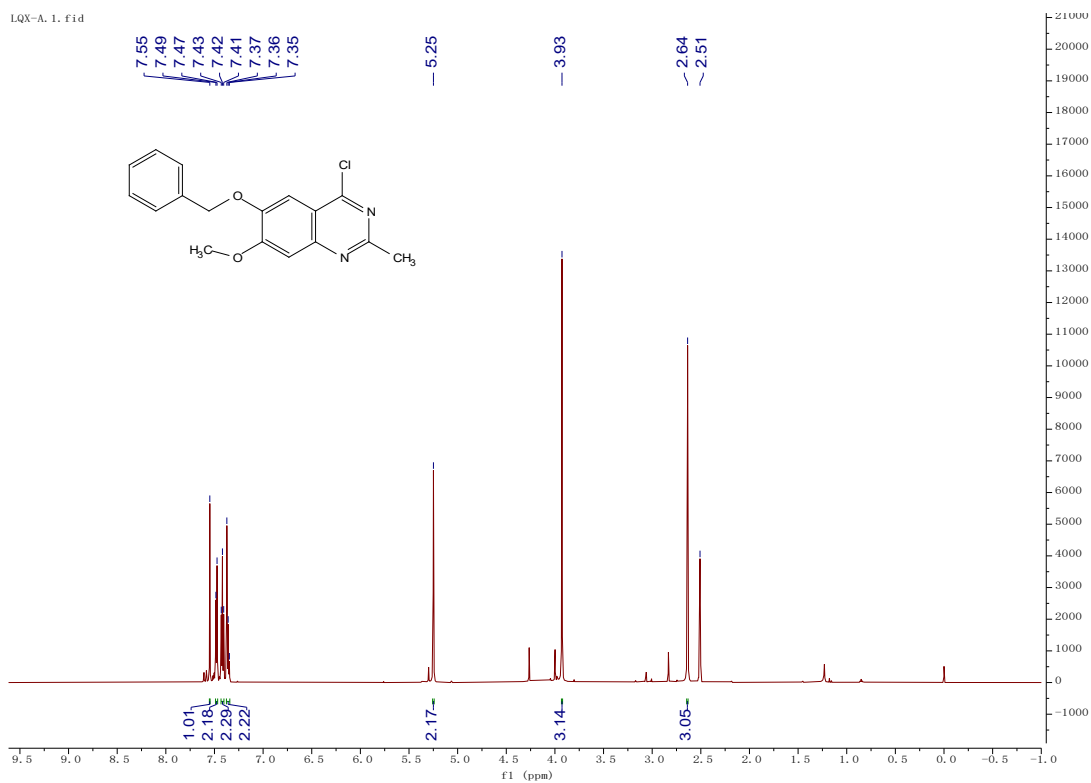

### <sup>1</sup>H NMR of compound 6

LQX-B01. 1. fid

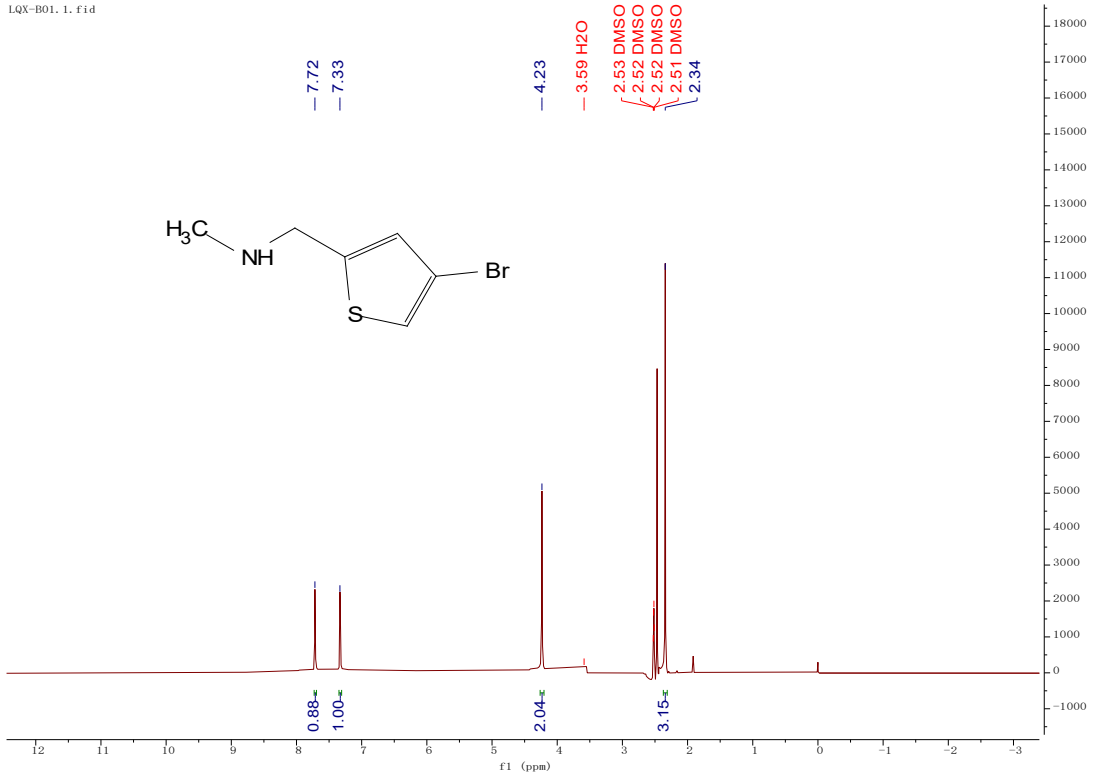

### <sup>1</sup>H NMR of compound 7a

LQX-ABN. 1. fid

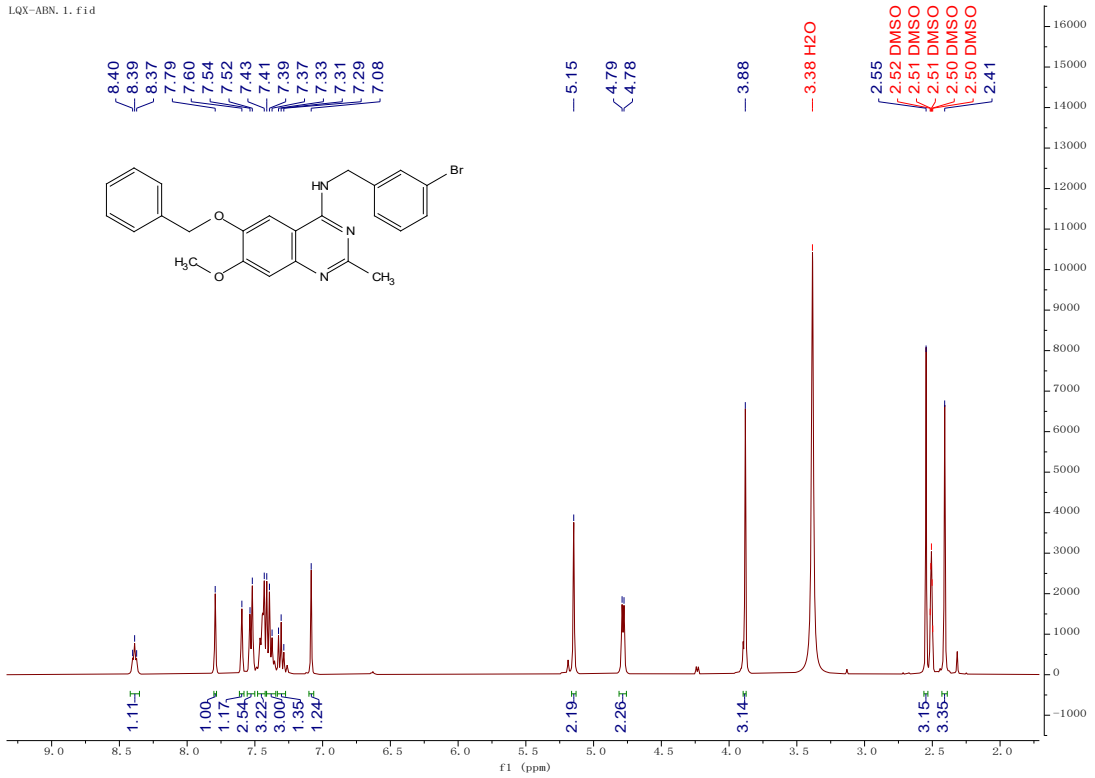

### <sup>1</sup>H NMR of compound 7b

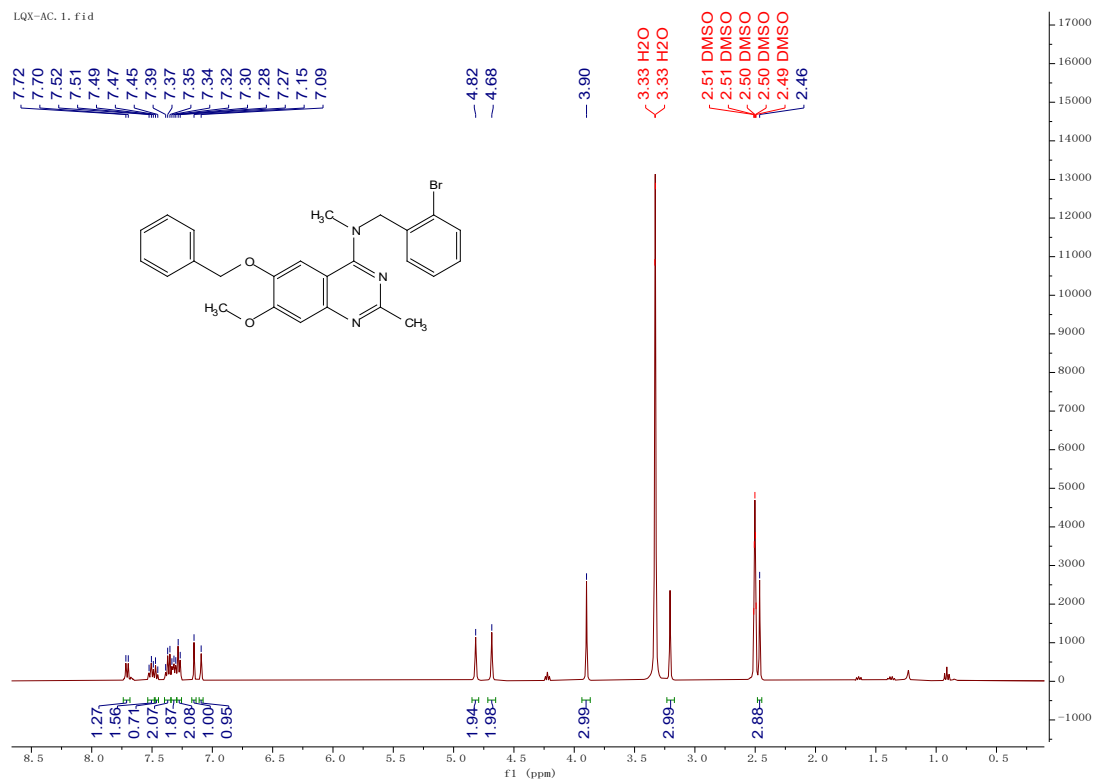

### <sup>1</sup>H NMR of compound 7c

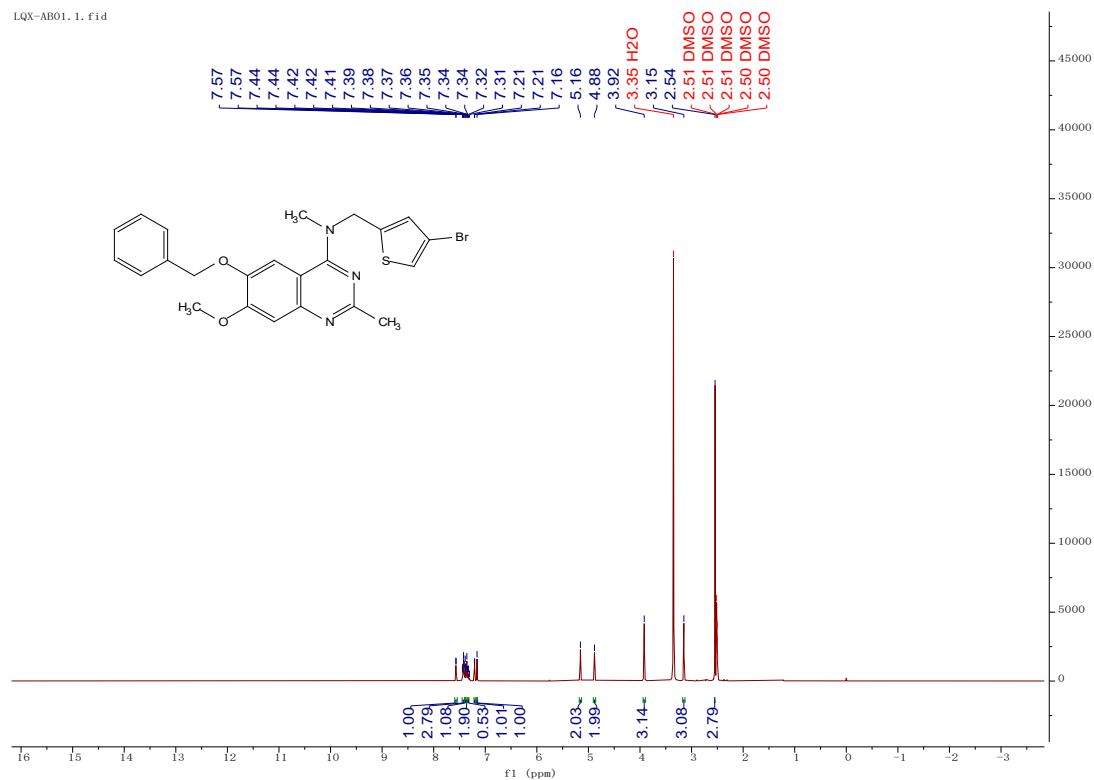



### <sup>1</sup>H NMR of compound 8a

LQX-ABNQB. 1. F1d

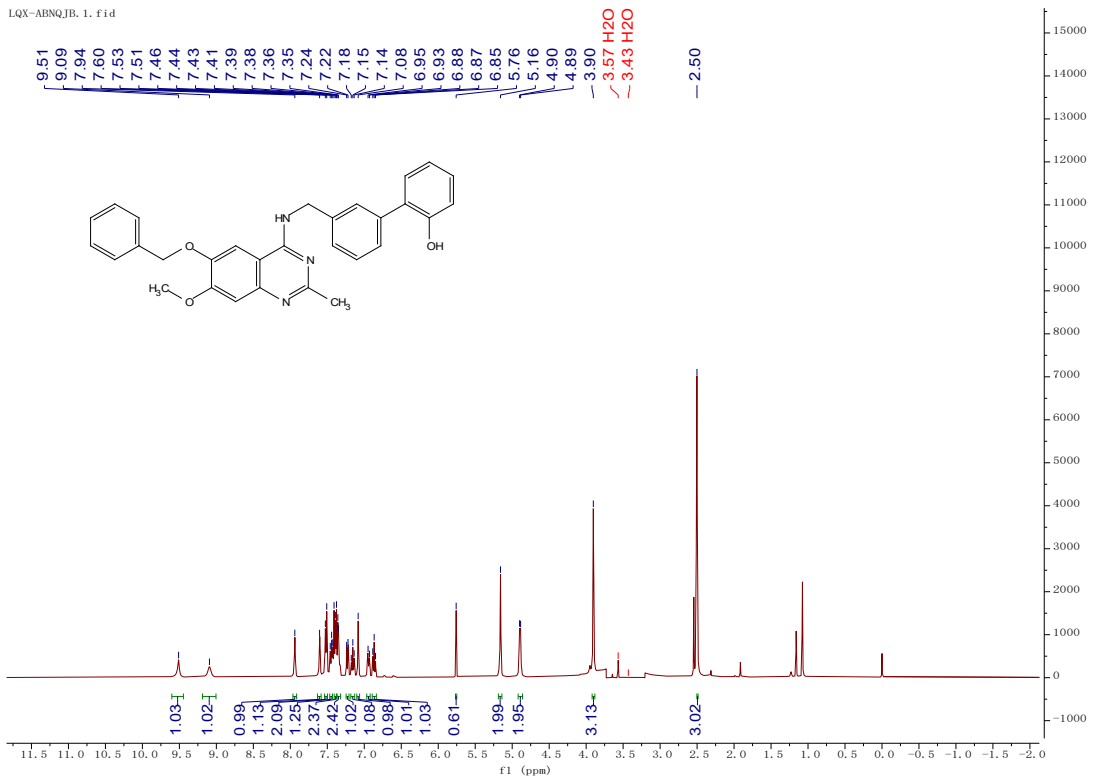

### <sup>1</sup>H NMR of compound 8b

LQX-ABNJFN. 1. F1d

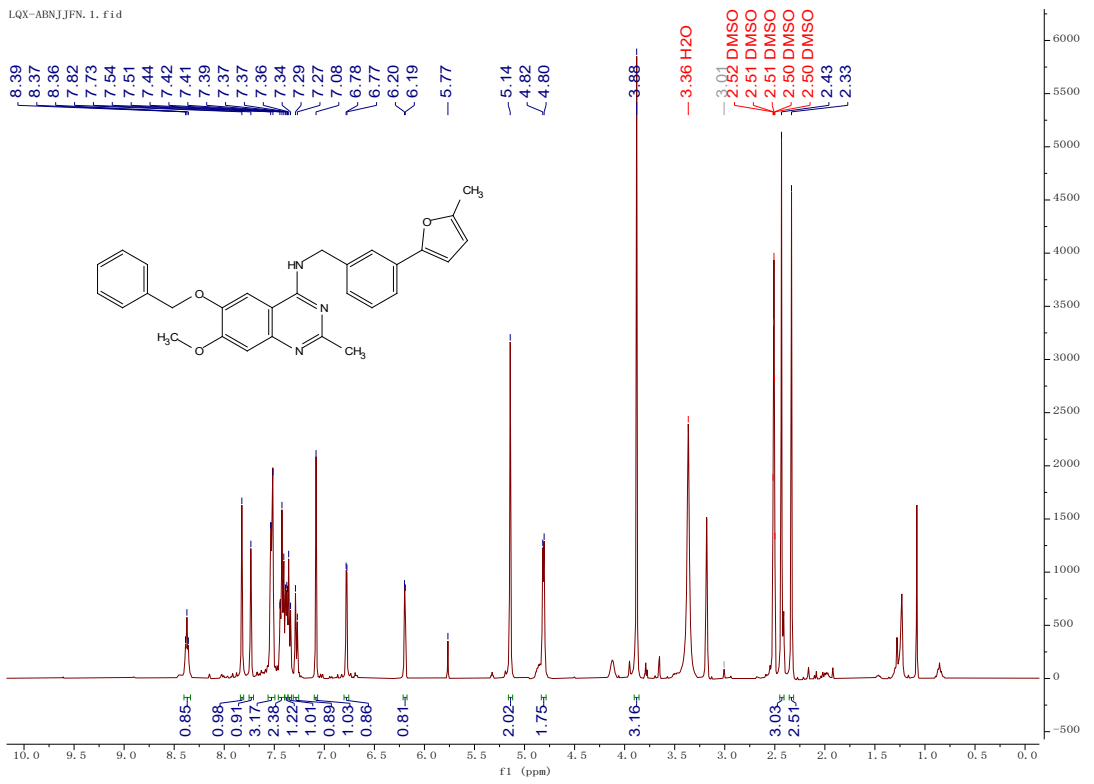

### <sup>1</sup>H NMR of compound **8c**

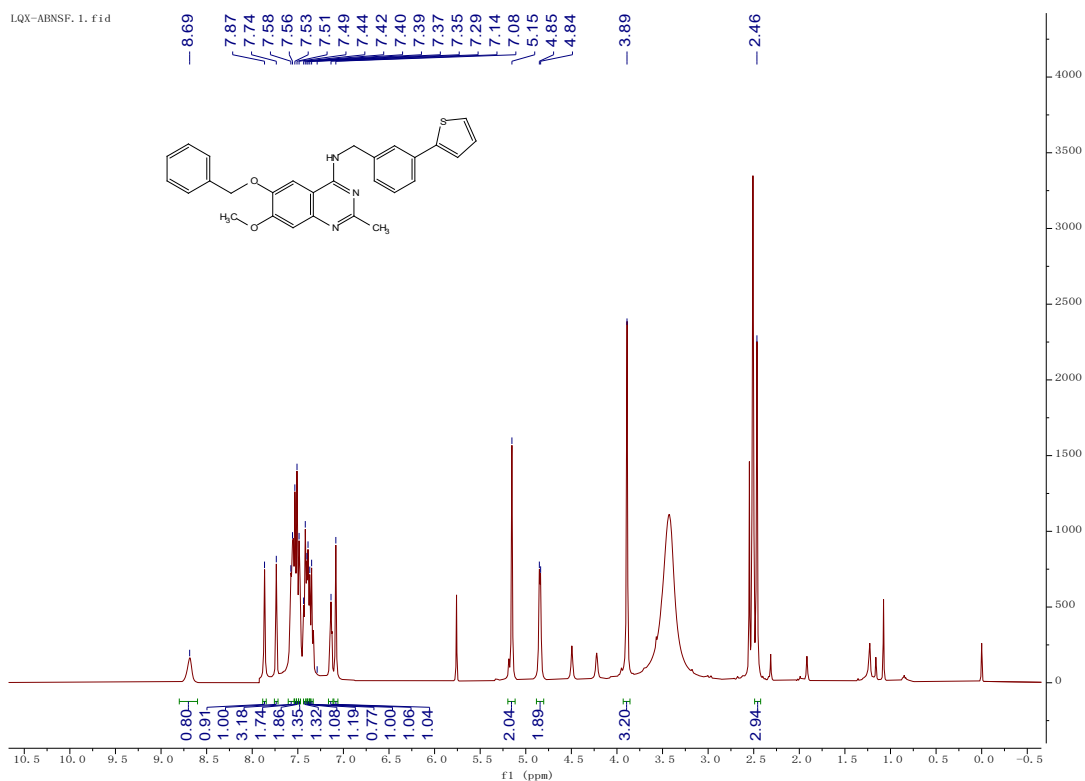

### <sup>1</sup>H NMR of compound **8d**

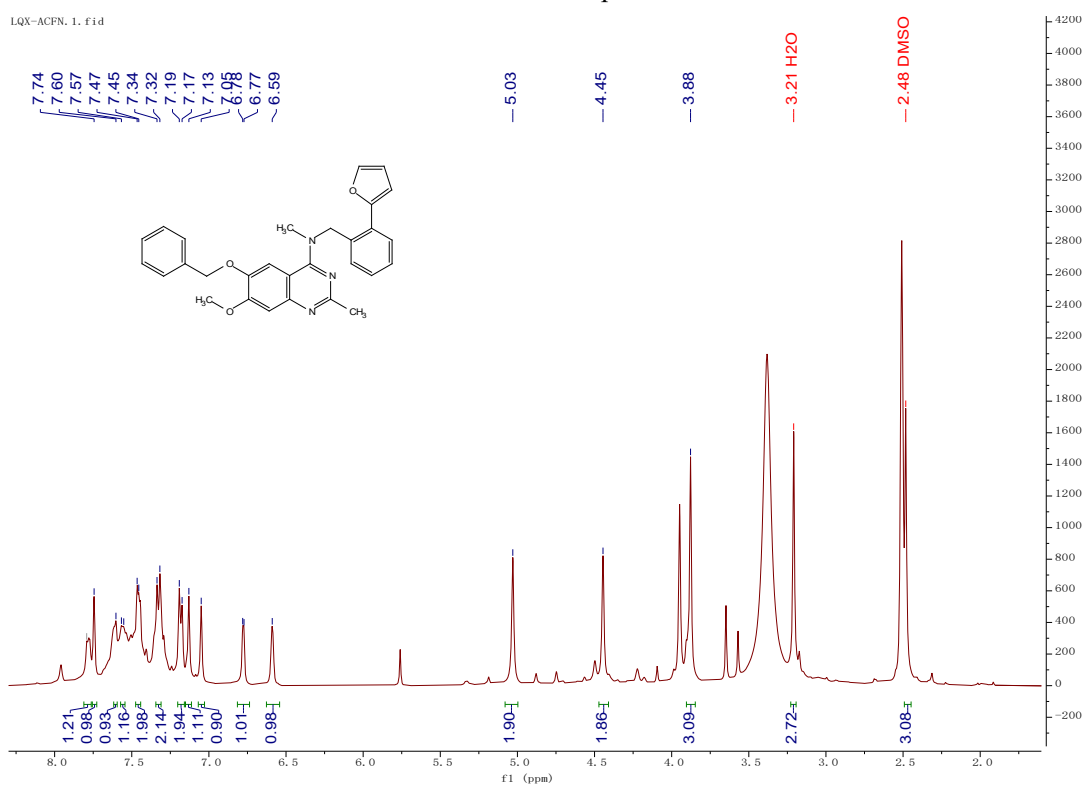

### <sup>1</sup>H NMR of compound **8e**

LQX-ACQJJB. 1. F1d

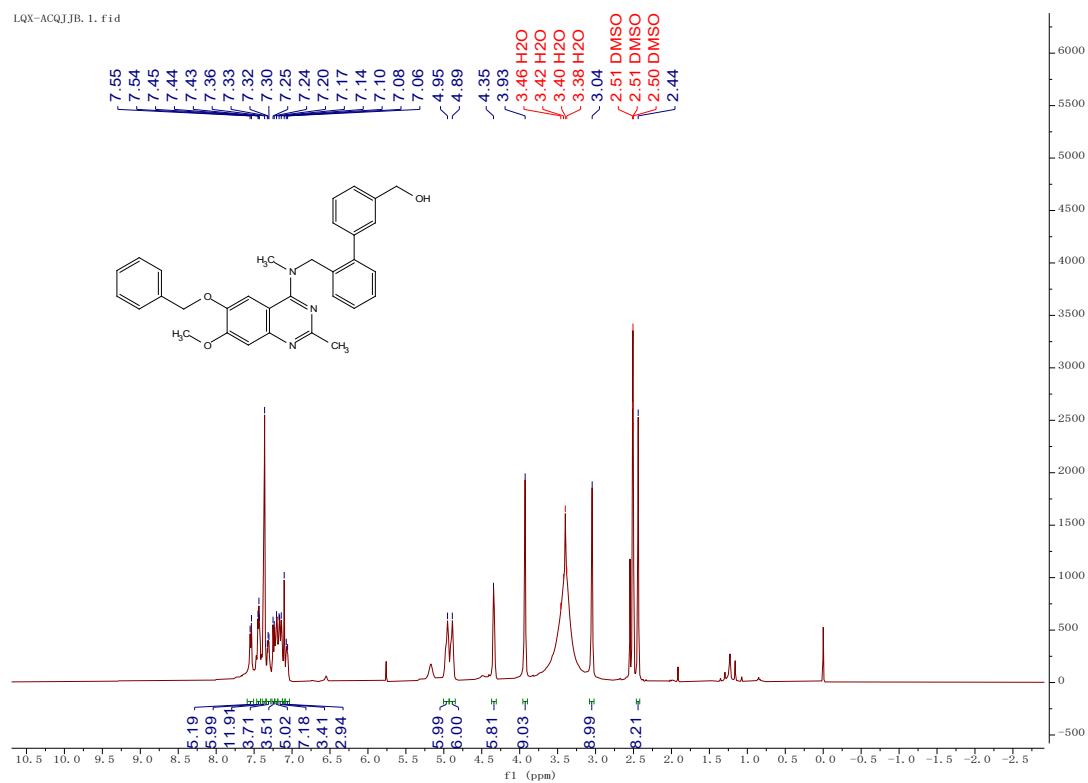

### <sup>1</sup>H NMR of compound **8f**

LQX-ACFBD. 1. f1d

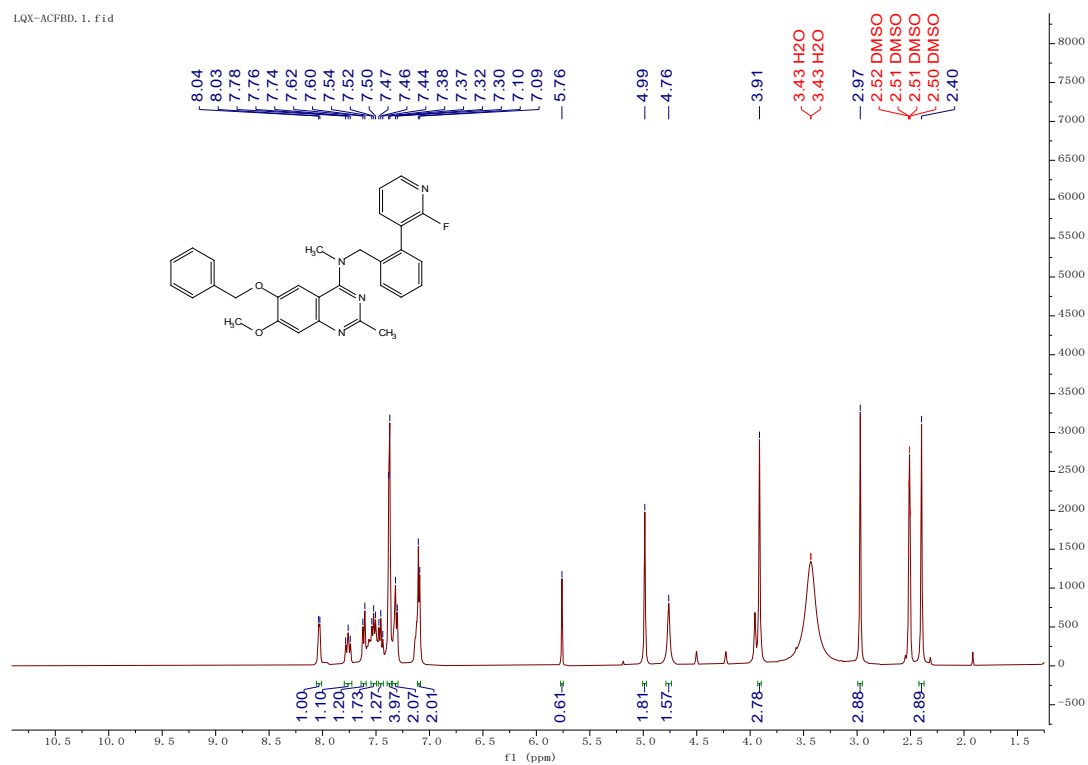

### <sup>1</sup>H NMR of compound 8g

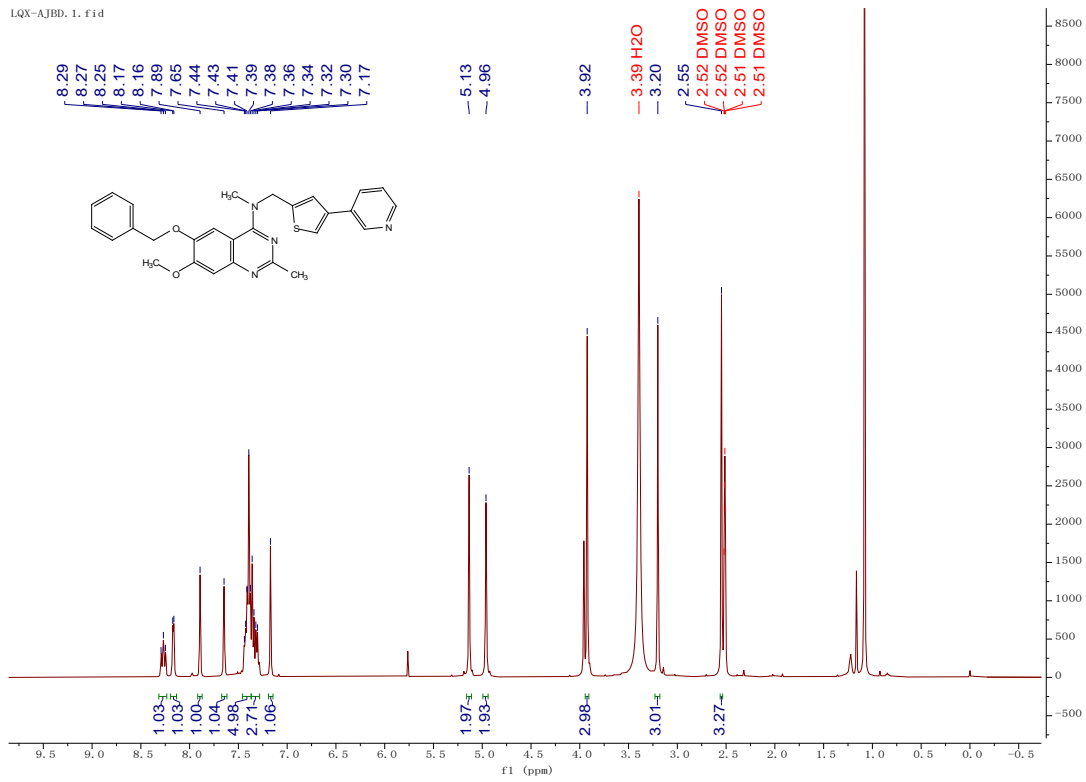

### <sup>1</sup>H NMR of compound 8h

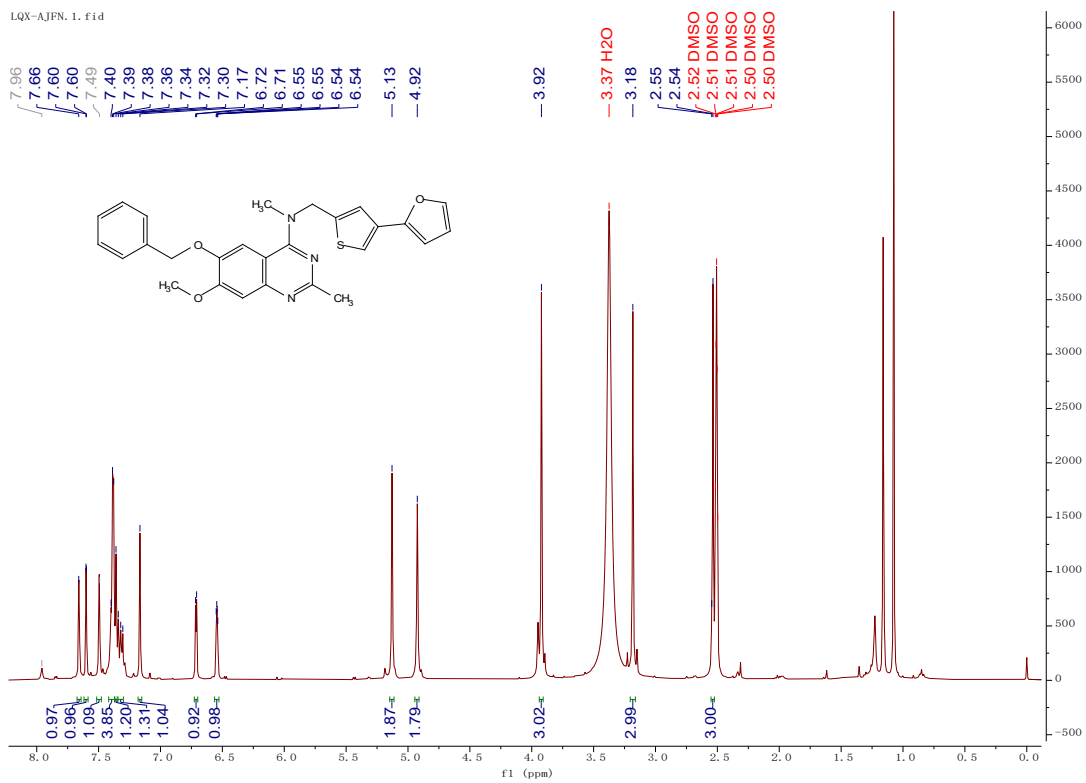

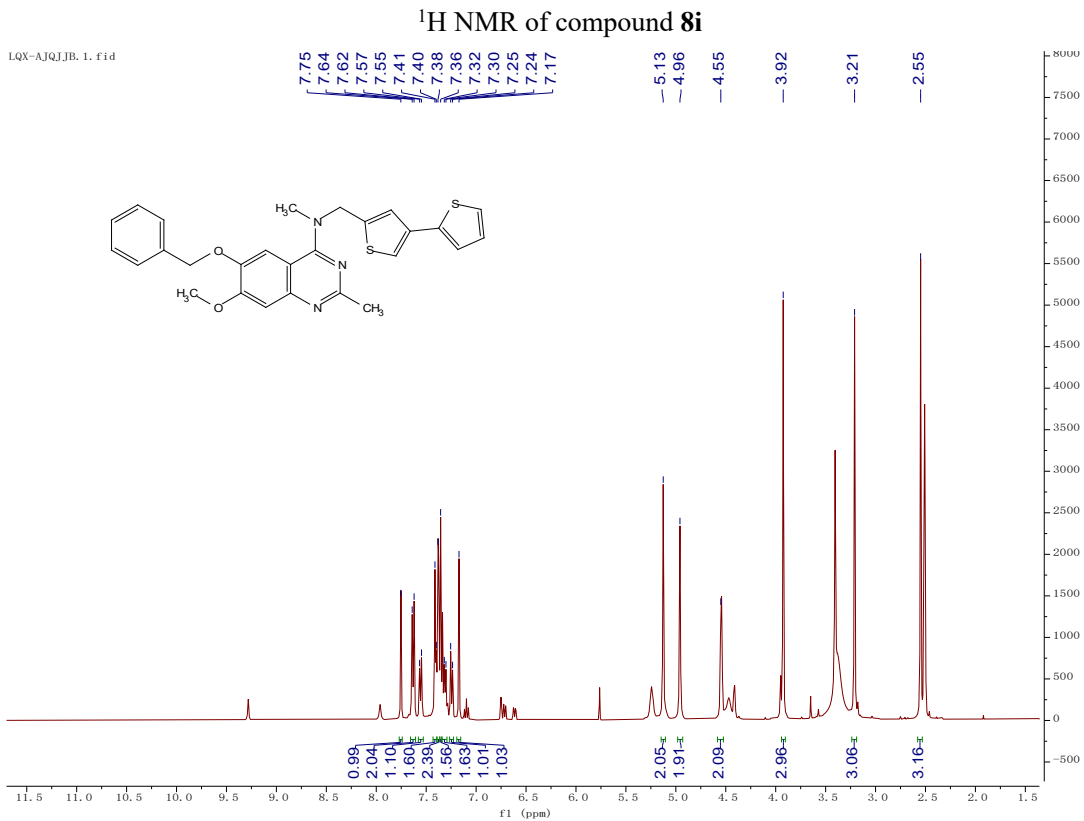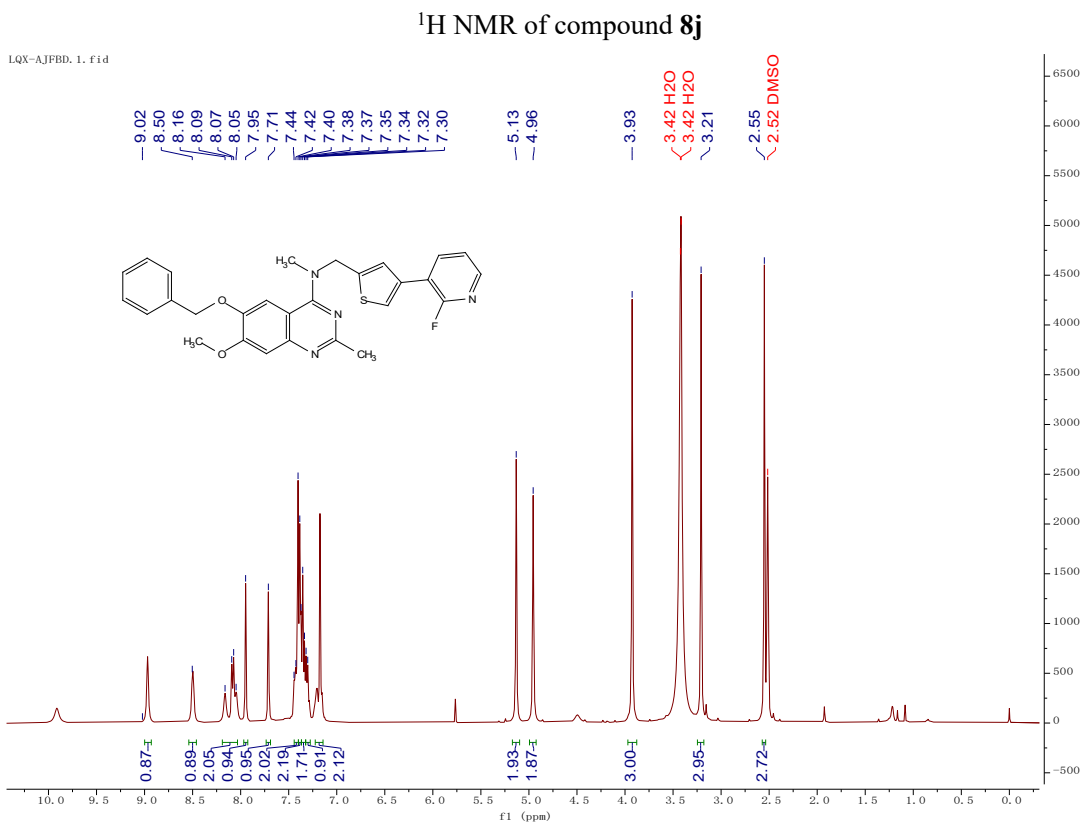

### <sup>1</sup>H NMR of compound **8k**

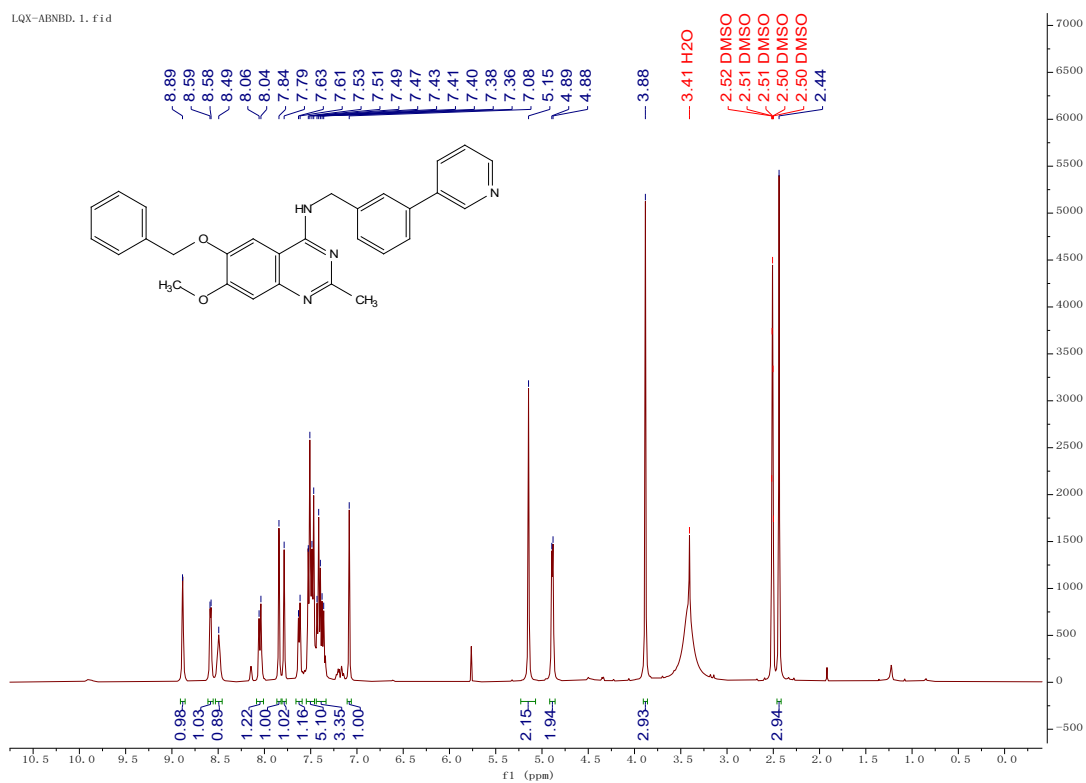

### <sup>1</sup>H NMR of compound **8l**

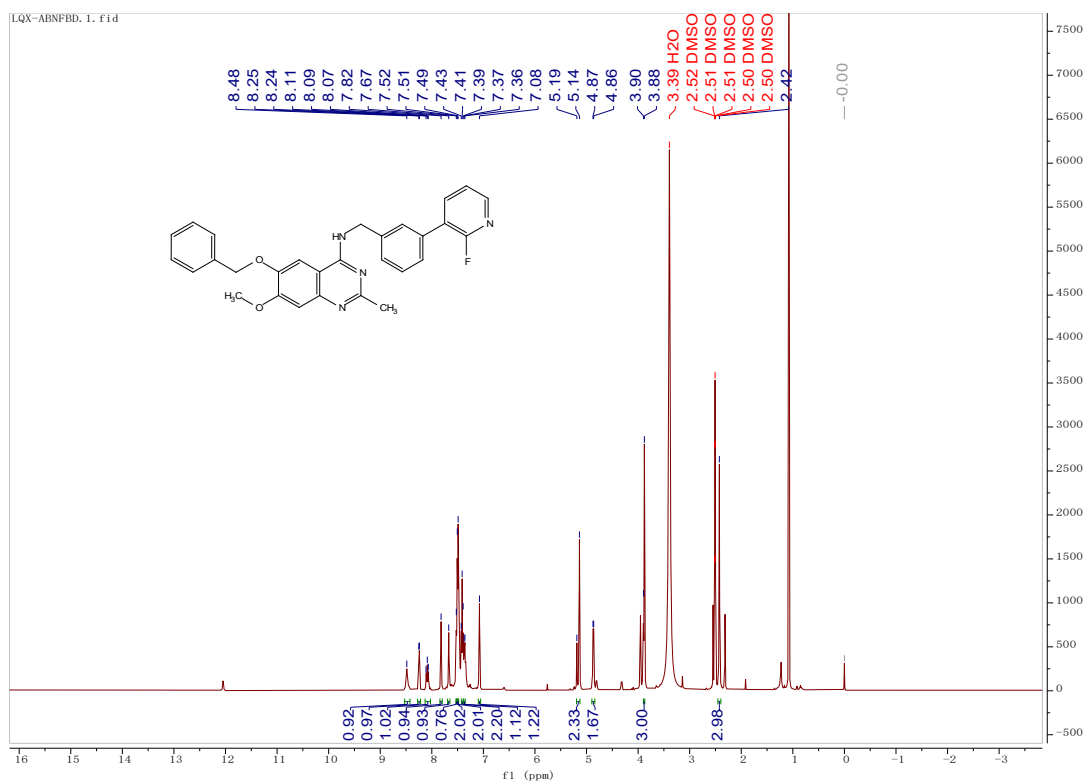

### <sup>1</sup>H NMR of compound 8m

LQX-ACBD. 1. F1d

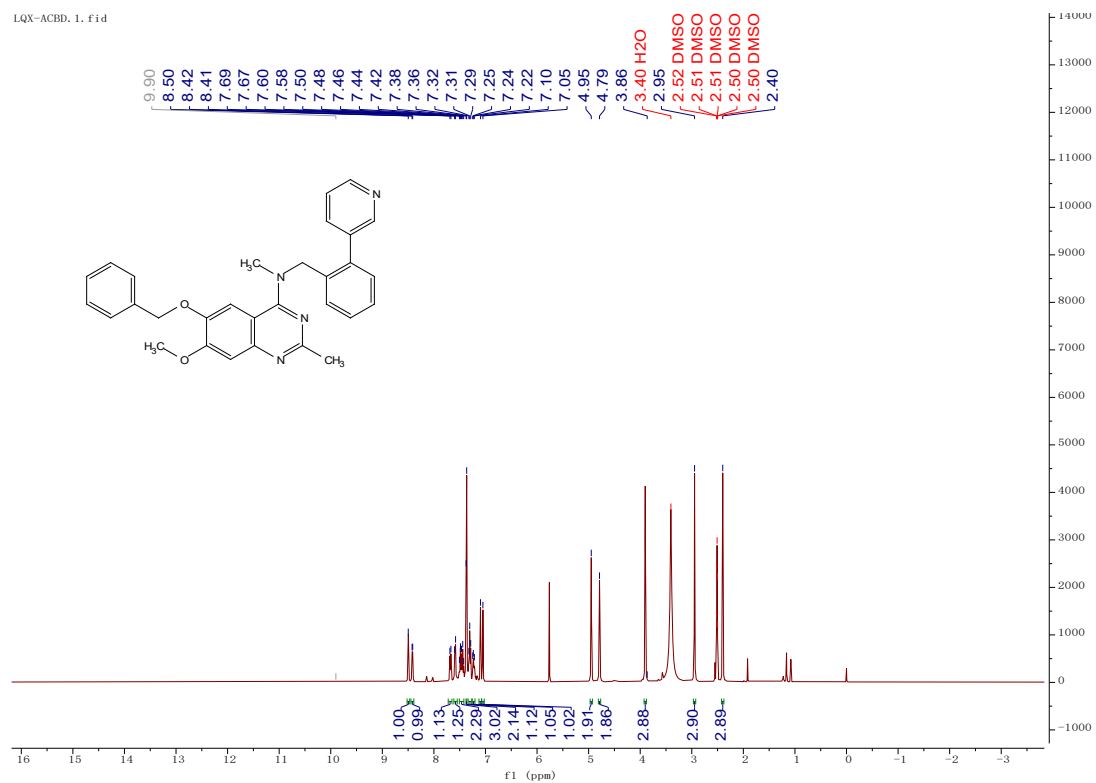

### <sup>1</sup>H NMR of compound 8n

LQX-ACJYJB. 1. F1d

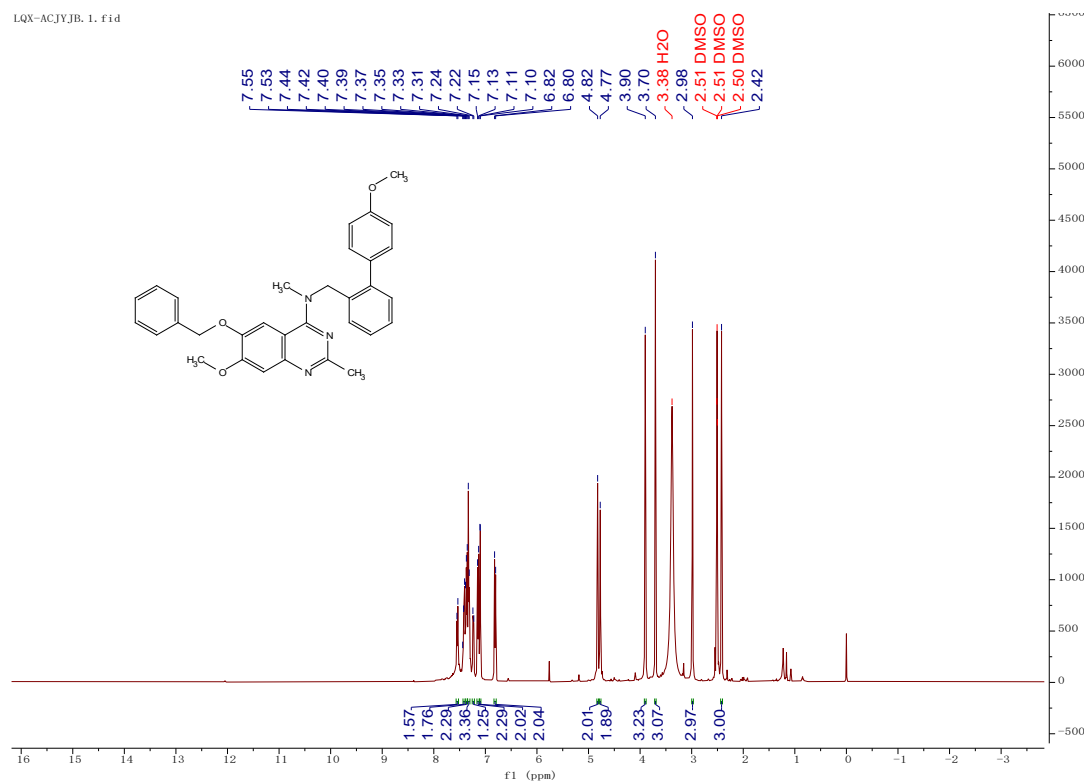

### <sup>1</sup>H NMR of compound **8o**

LQX-ABNJYJB. 1. fid

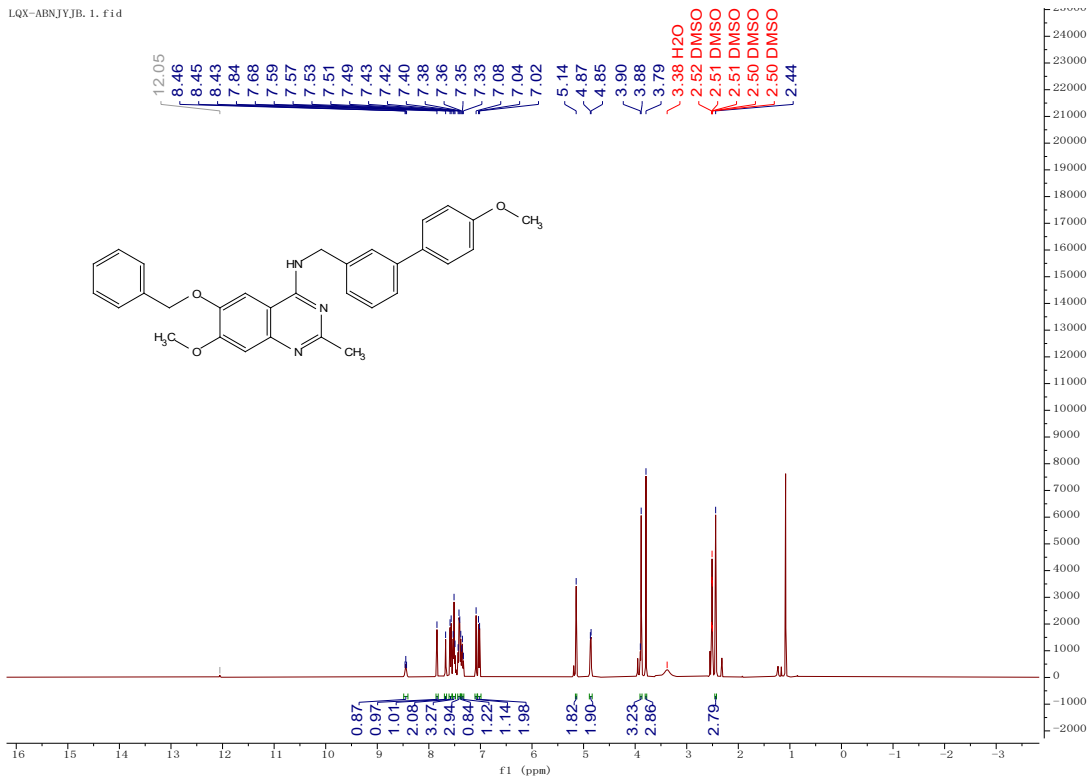

### <sup>1</sup>H NMR of compound **8p**

LQX-AJQJJB. 1. fid

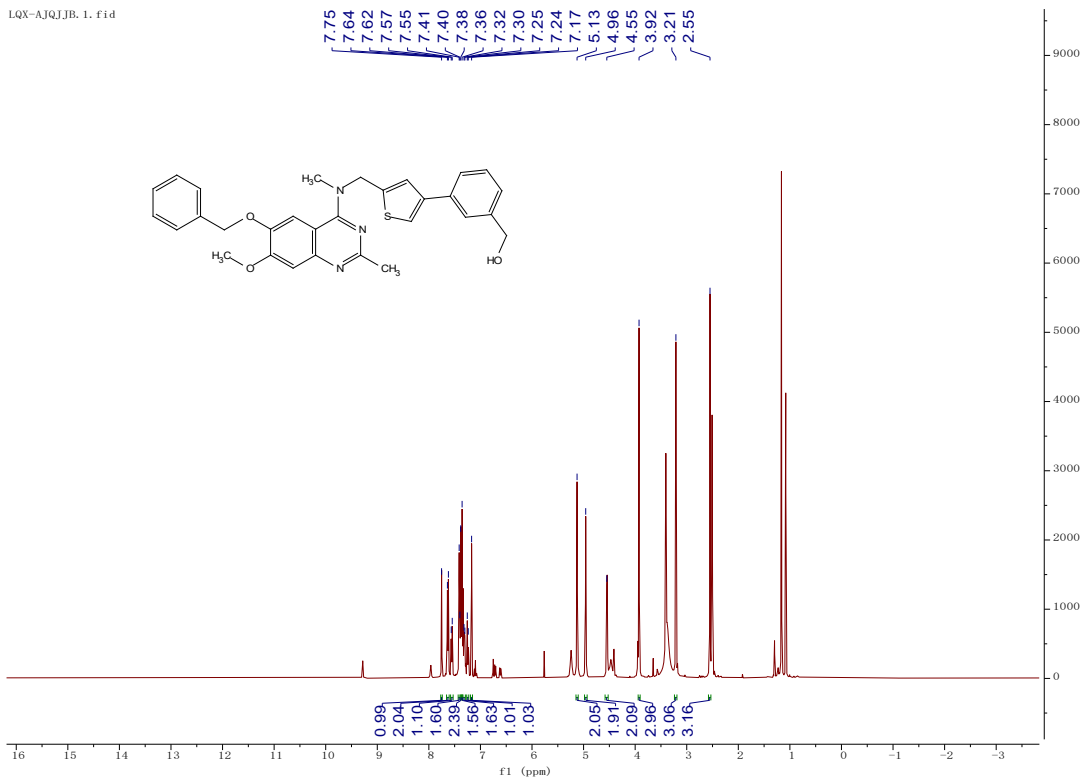



# <sup>1</sup>H NMR of compound 8q

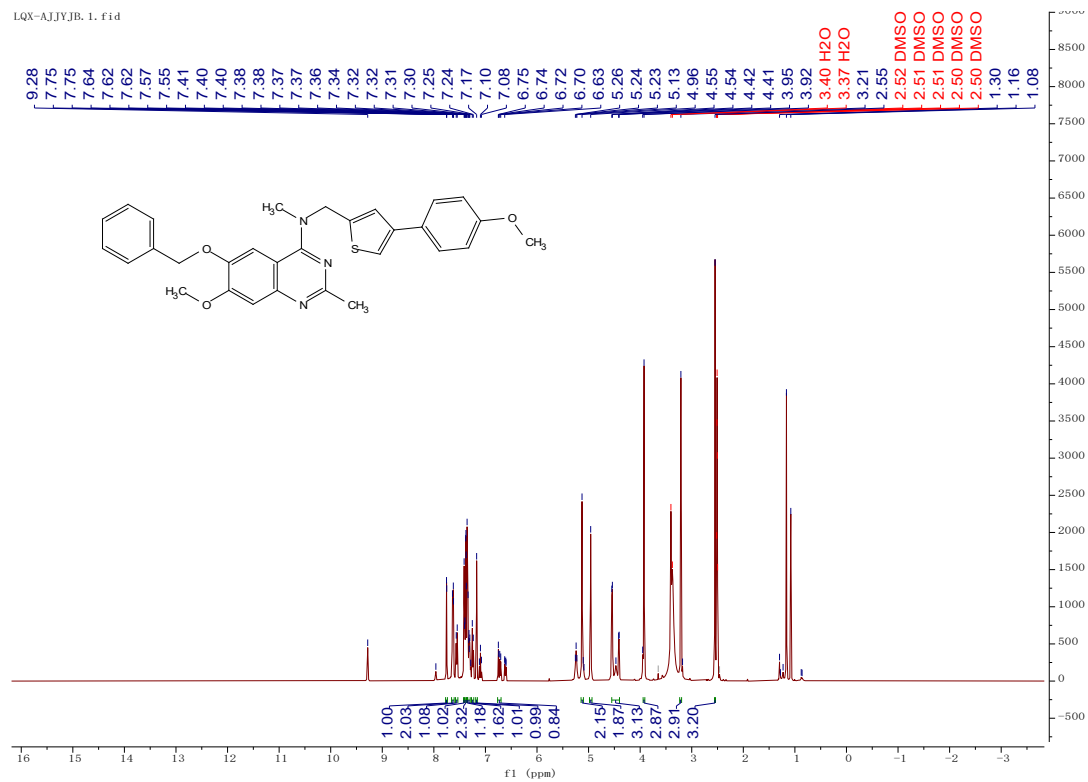

# <sup>13</sup>C NMR (150MHz) of compounds

## <sup>13</sup>C NMR of compound 1

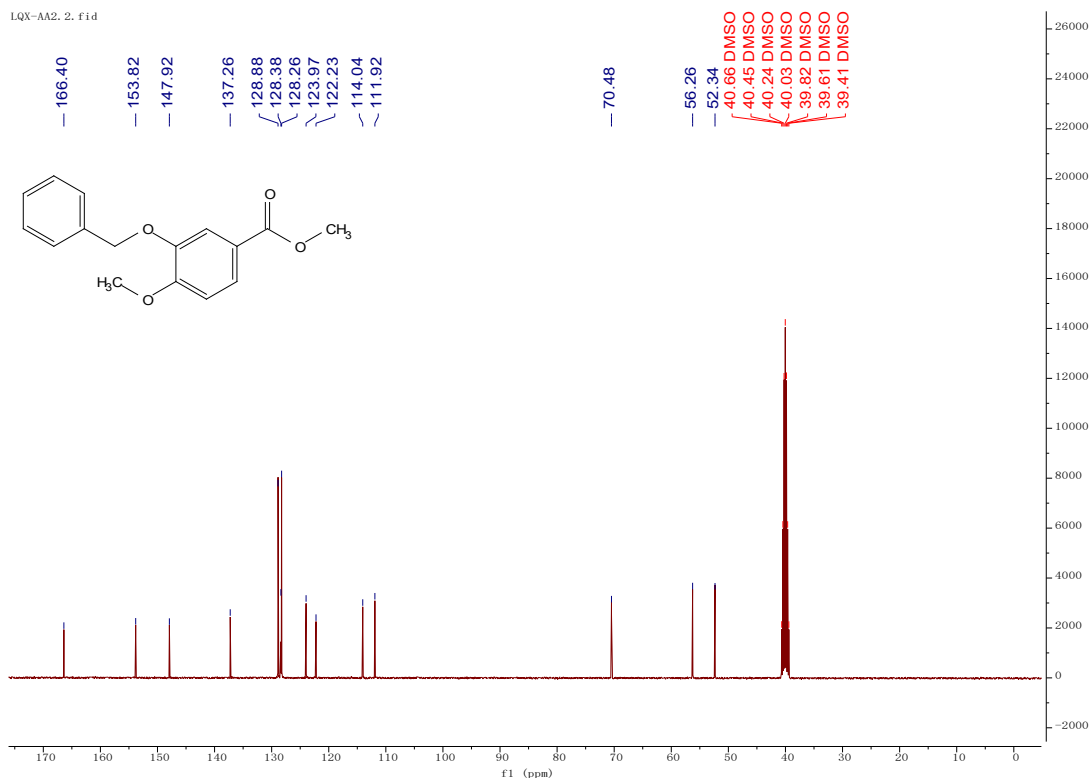

## <sup>13</sup>C NMR of compound 7a

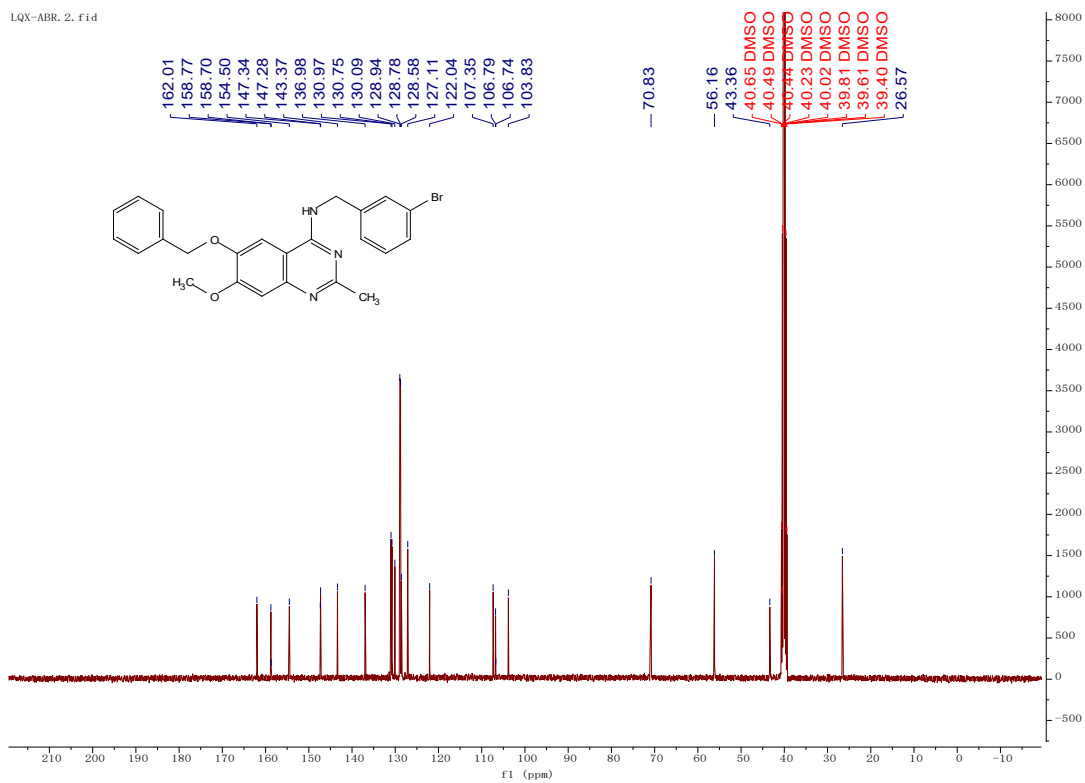

### <sup>13</sup>C NMR of compound 7b

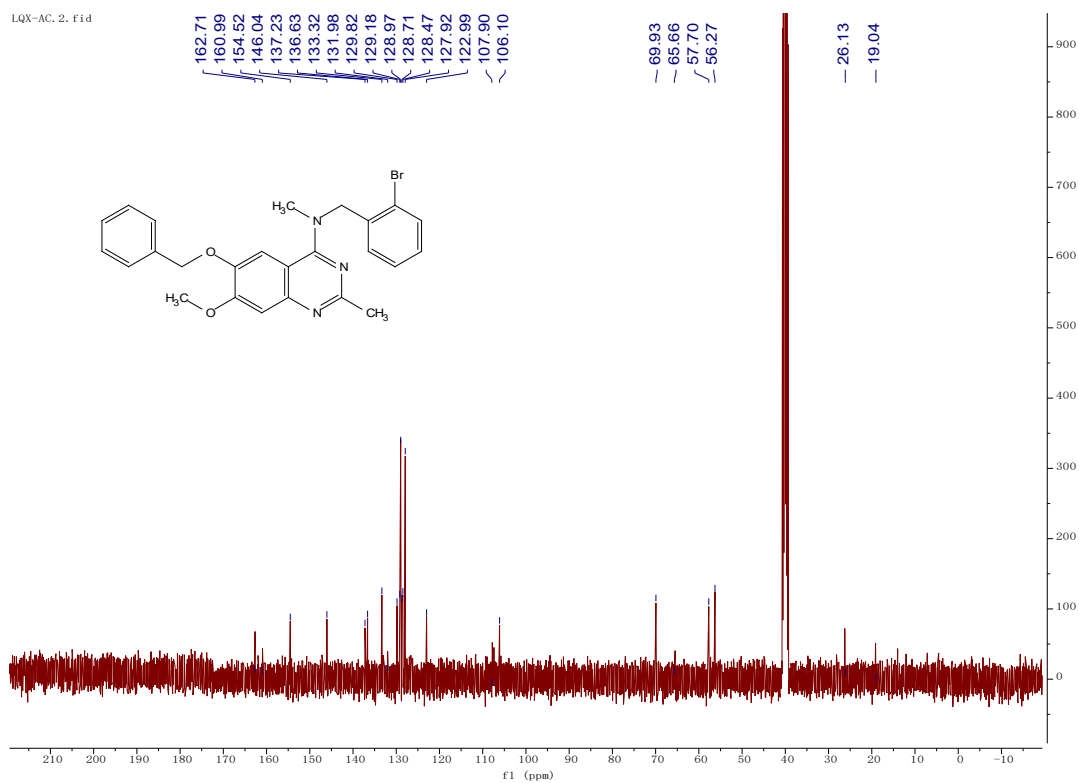

### <sup>13</sup>C NMR of compound 7c

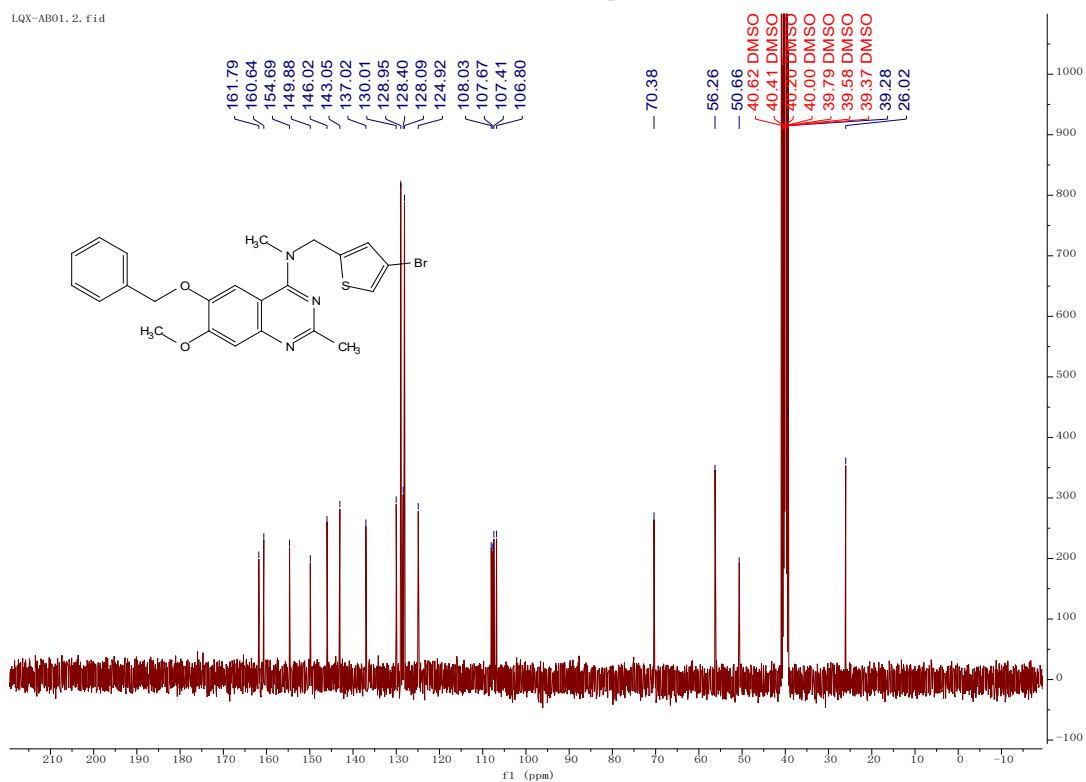

### <sup>13</sup>C NMR of compound 8a

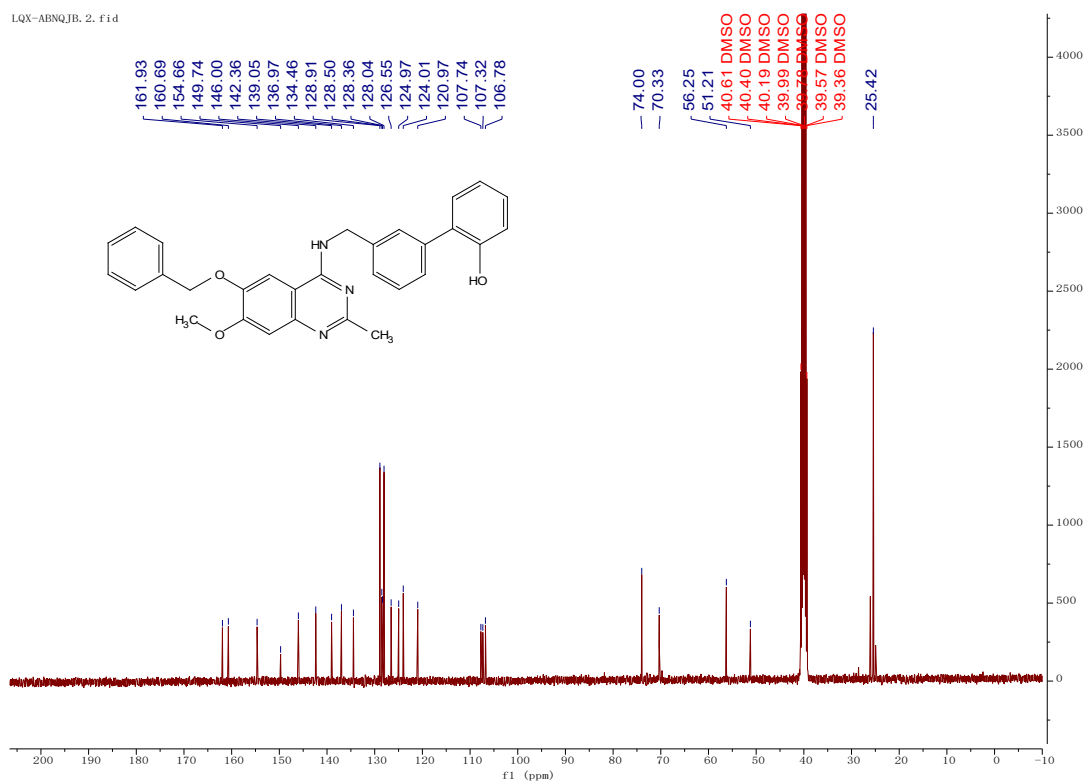

### <sup>13</sup>C NMR of compound 8b

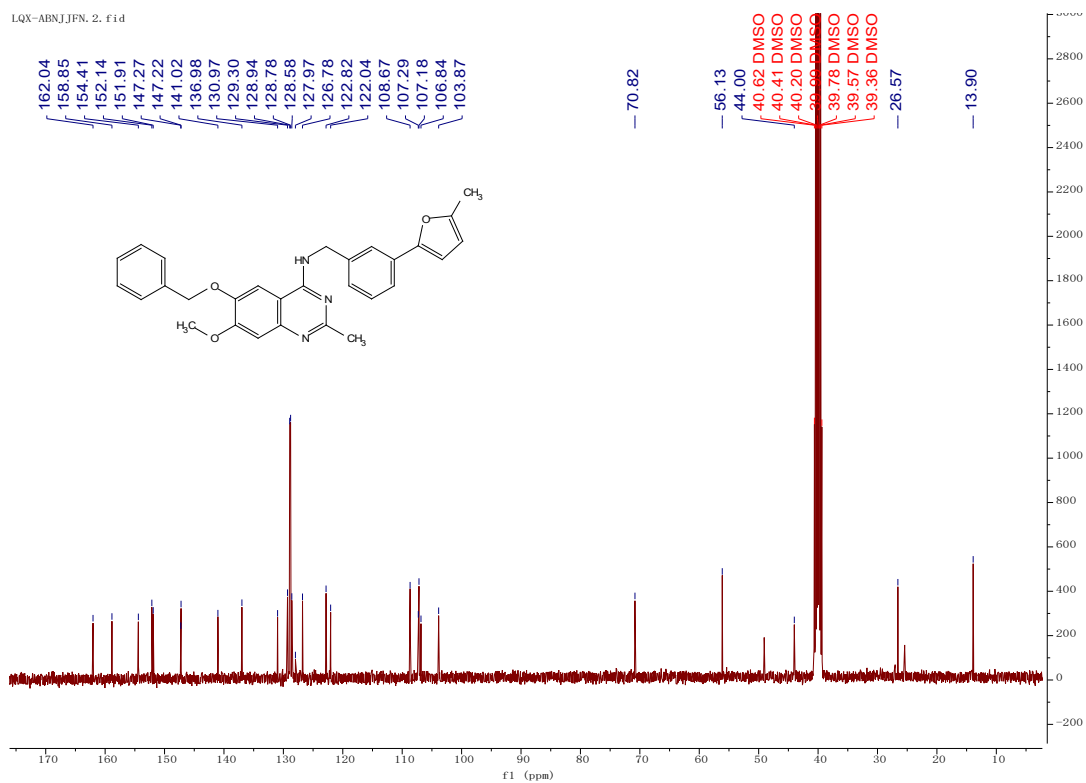

### <sup>13</sup>C NMR of compound 8c

LQX-AJSF. 2. fid

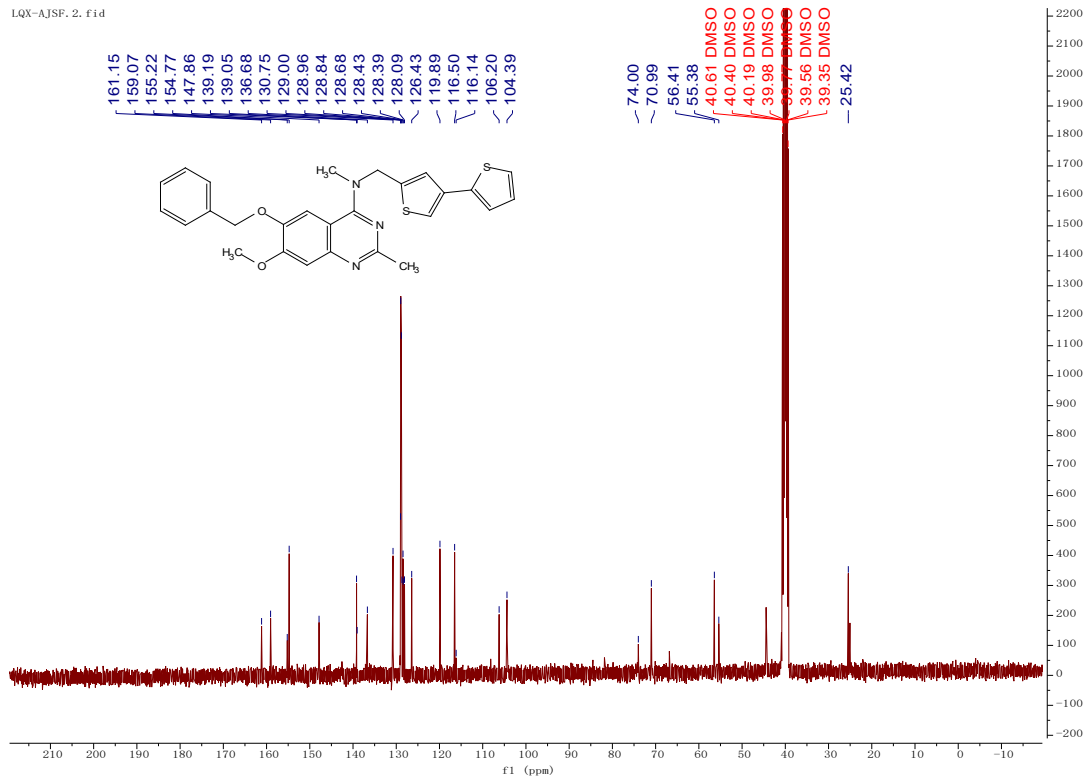

### <sup>13</sup>C NMR of compound 8d

LQX-AJFN. 2. fid

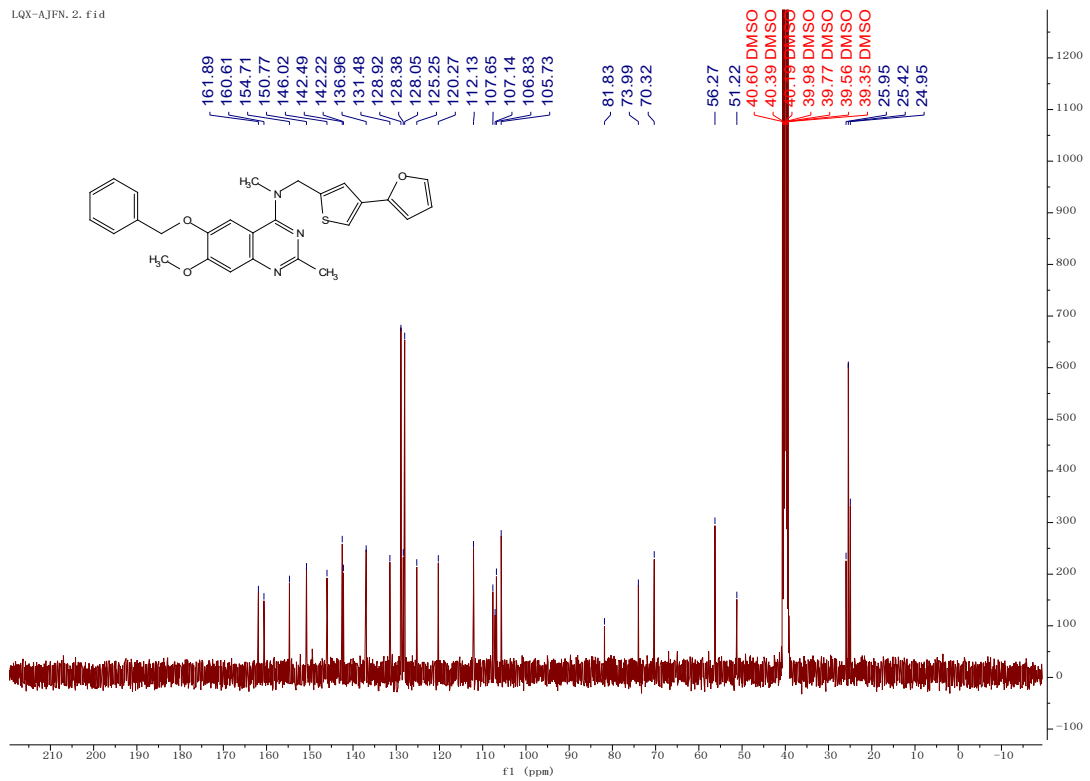

### <sup>13</sup>C NMR of compound **8e**

LQX-AJQJJB. 2. F1d

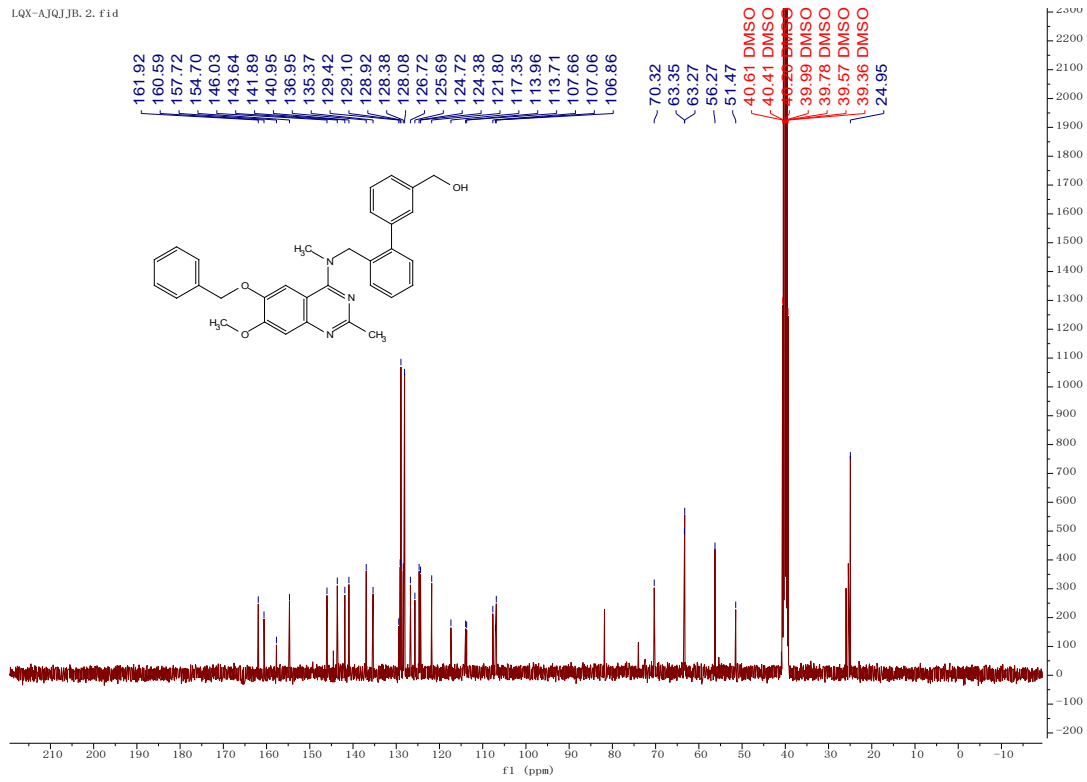

### <sup>13</sup>C NMR of compound **8f**

LQX-ACFBD. 2. f1d

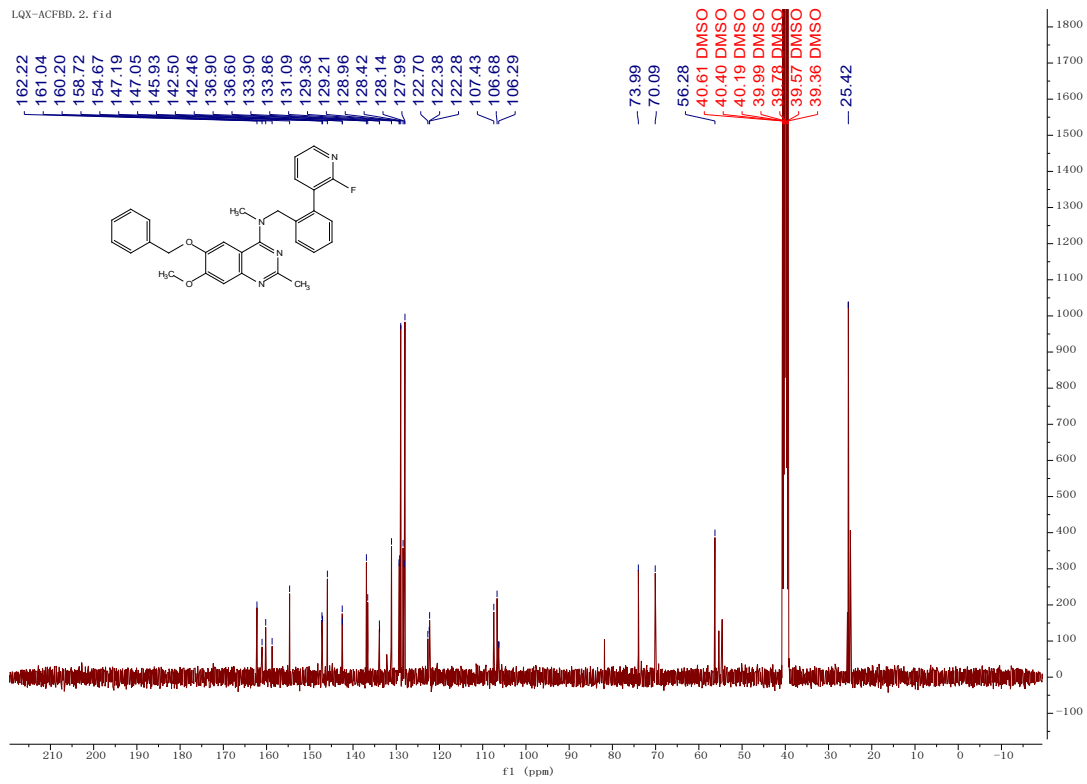

### <sup>13</sup>C NMR of compound 8g

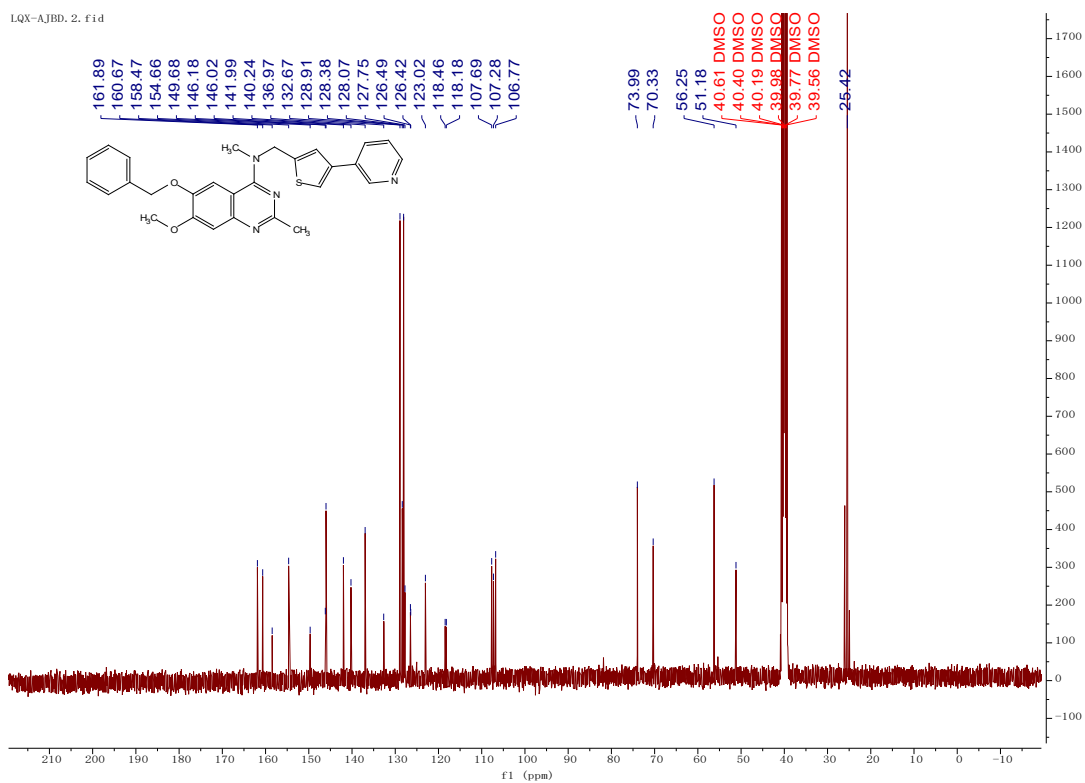

### <sup>13</sup>C NMR of compound 8h

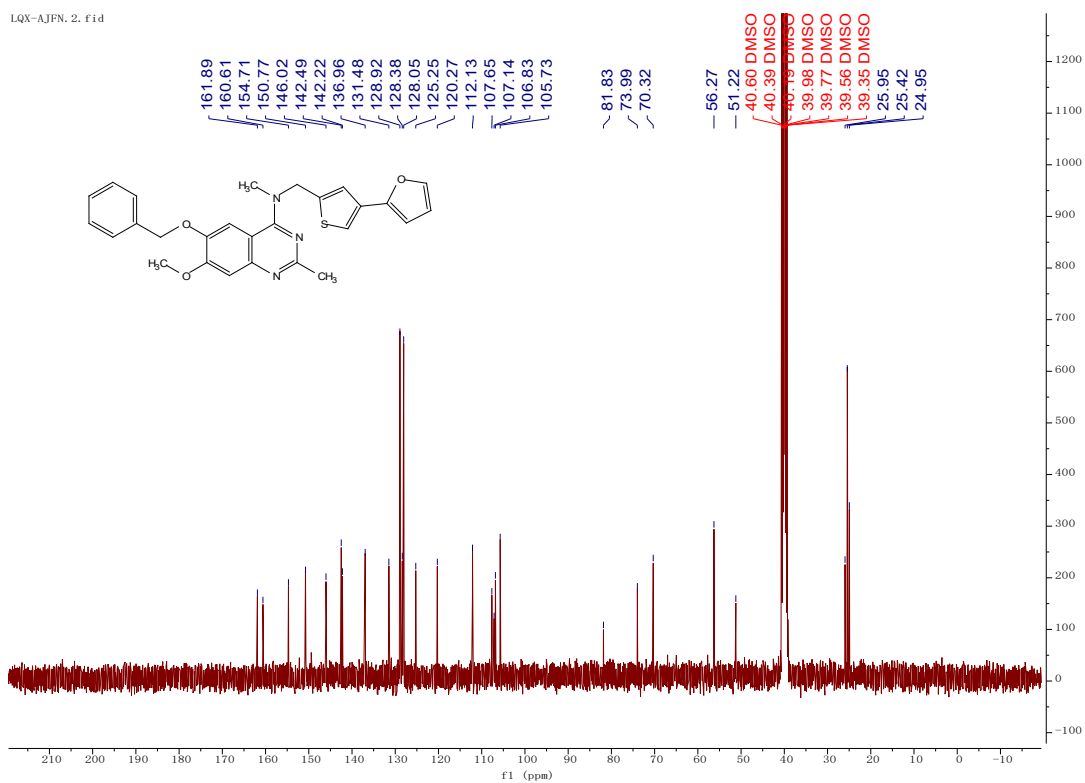

### <sup>13</sup>C NMR of compound **8i**

LQX-AJSF. 2. fid

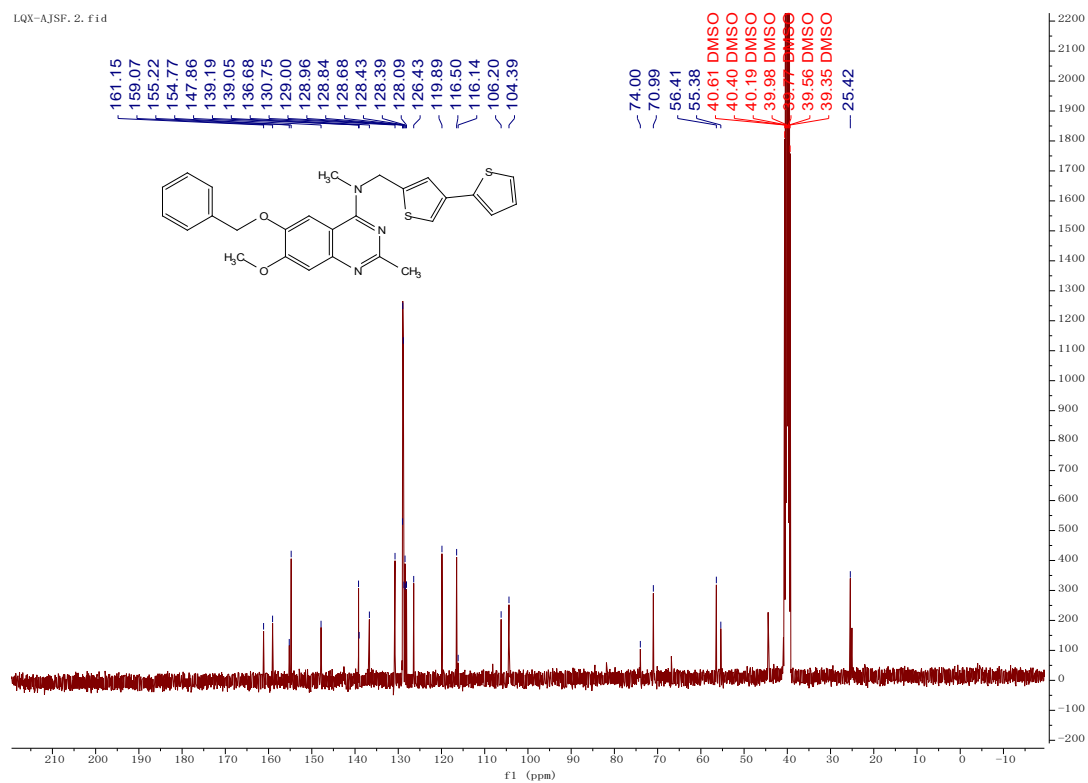

### <sup>13</sup>C NMR of compound **8j**

LQX-AJBD. 2. fid

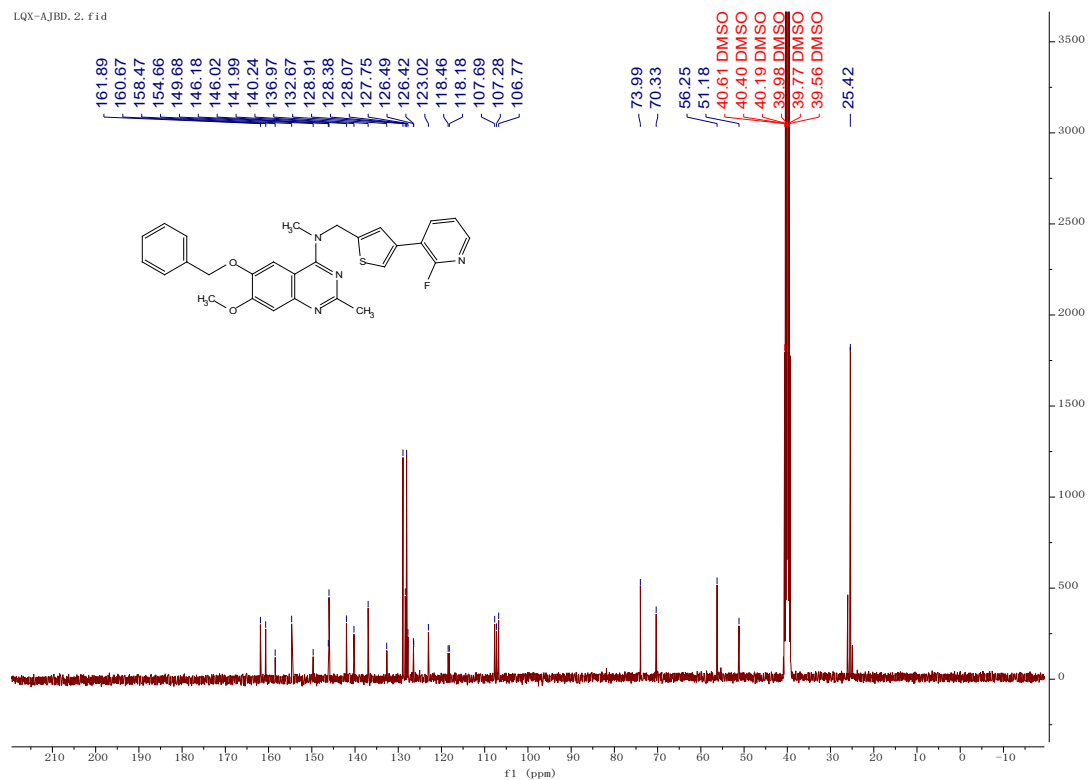



### <sup>13</sup>C NMR of compound 8k

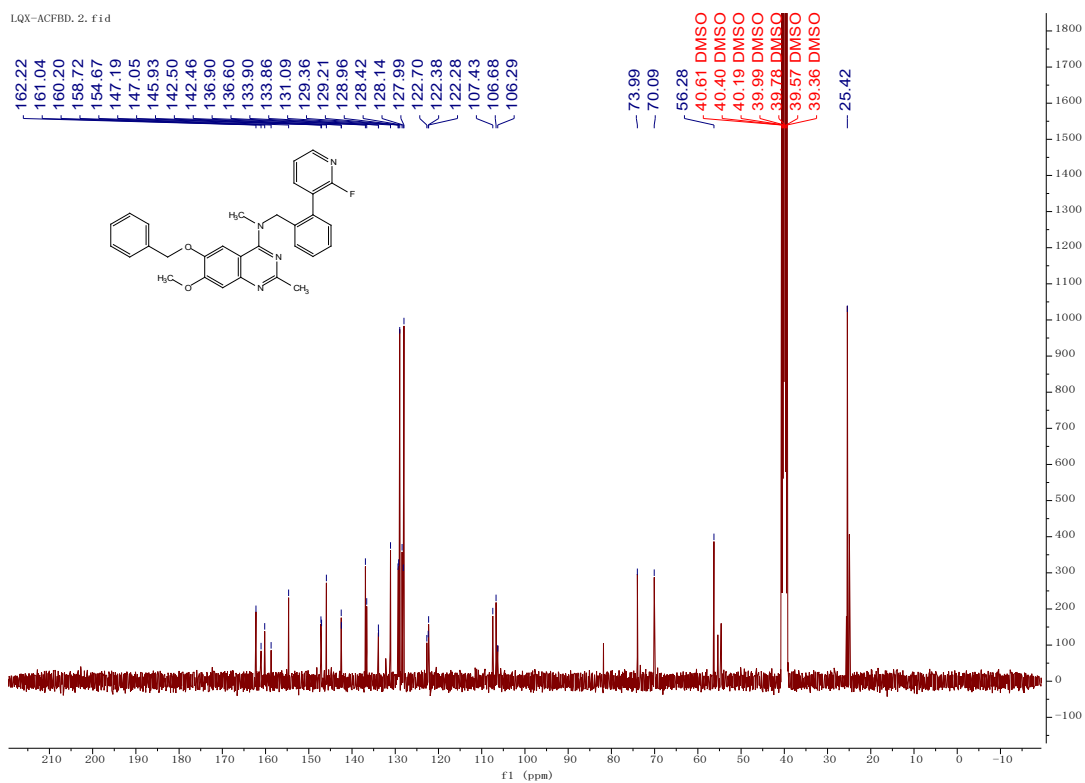

### <sup>13</sup>C NMR of compound 8l

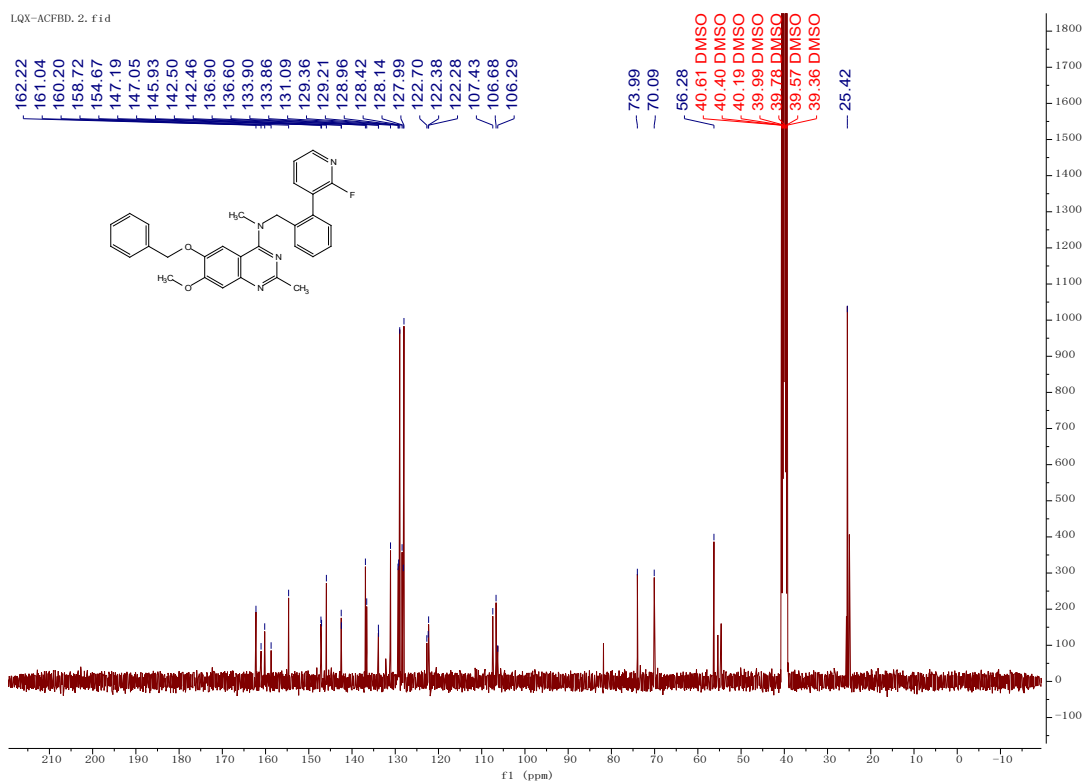

### <sup>13</sup>C NMR of compound **8m**

LQX-ACBD. 2. Fid

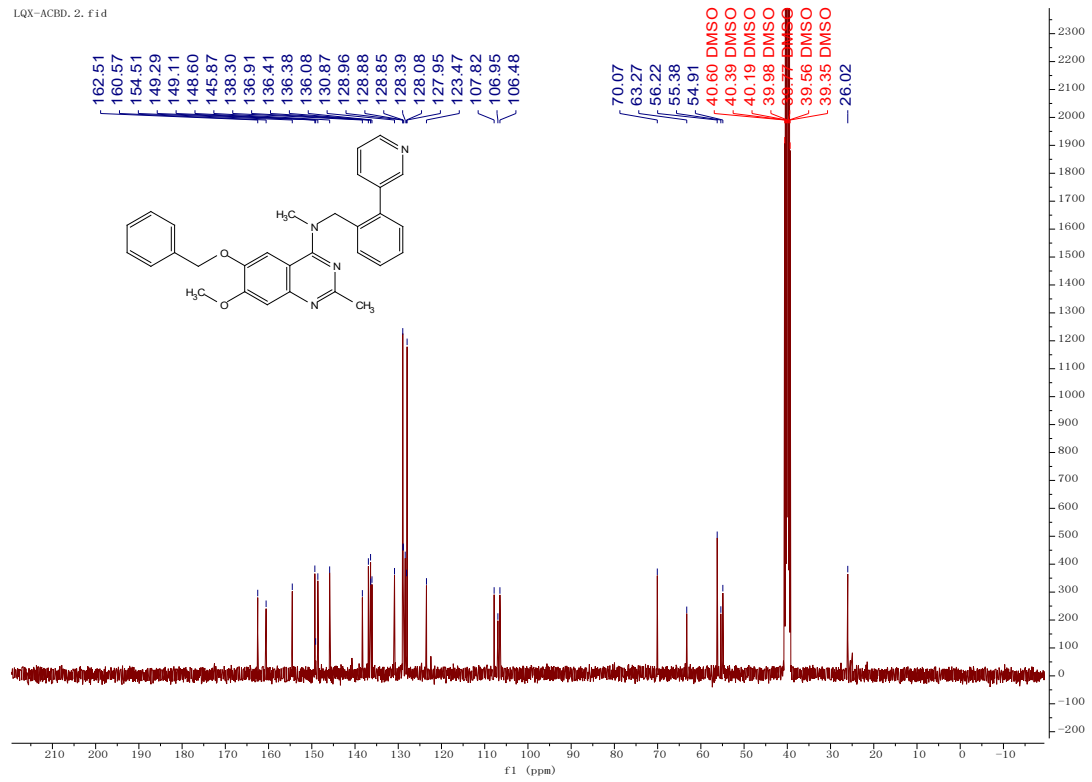

### <sup>13</sup>C NMR of compound **8n**

LQX-ACJYJB. 2. Fid

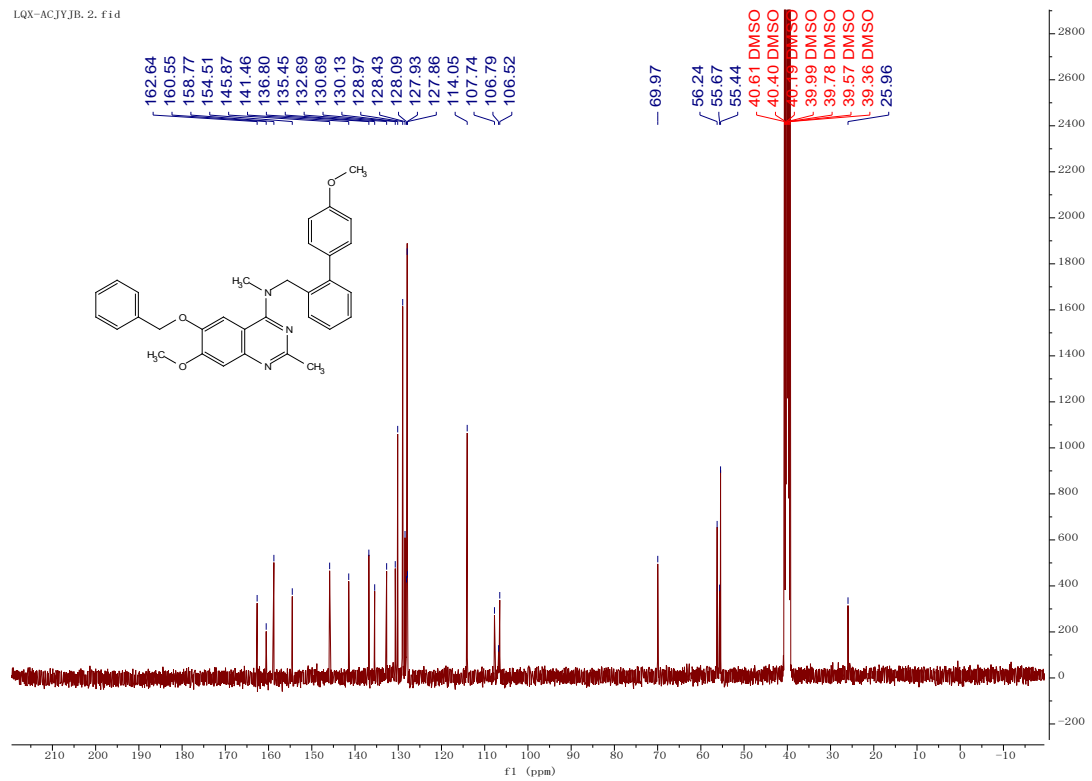

### <sup>13</sup>C NMR of compound **8o**

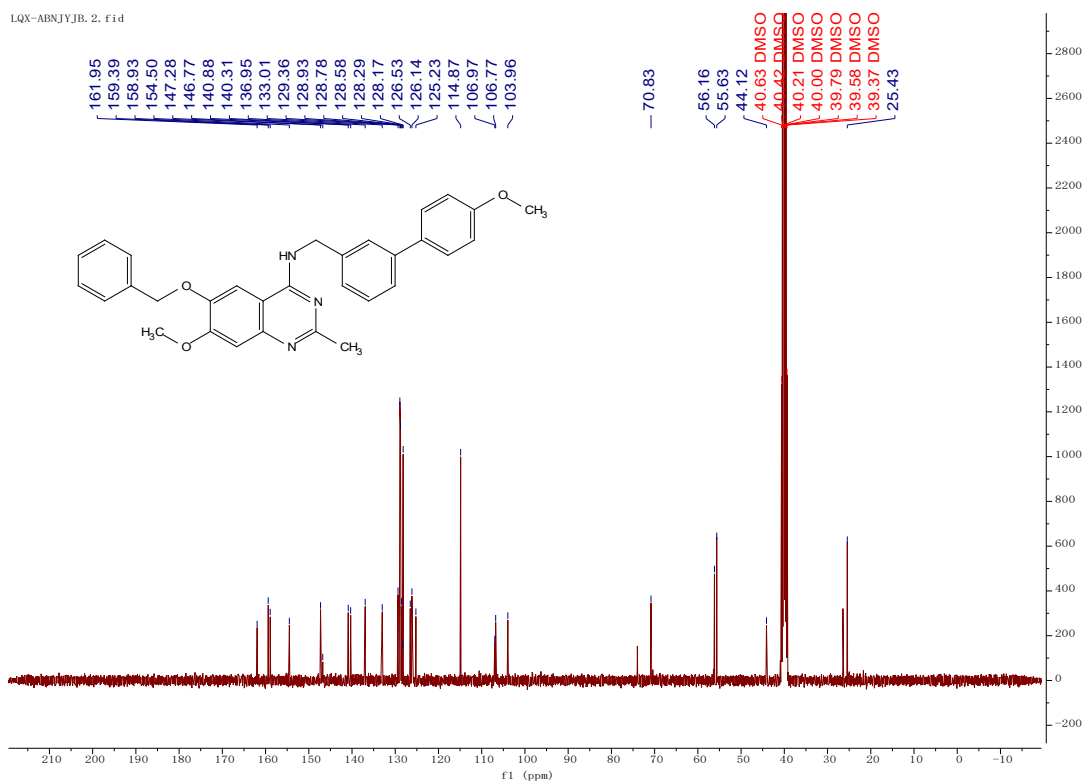

### <sup>13</sup>C NMR of compound **8p**

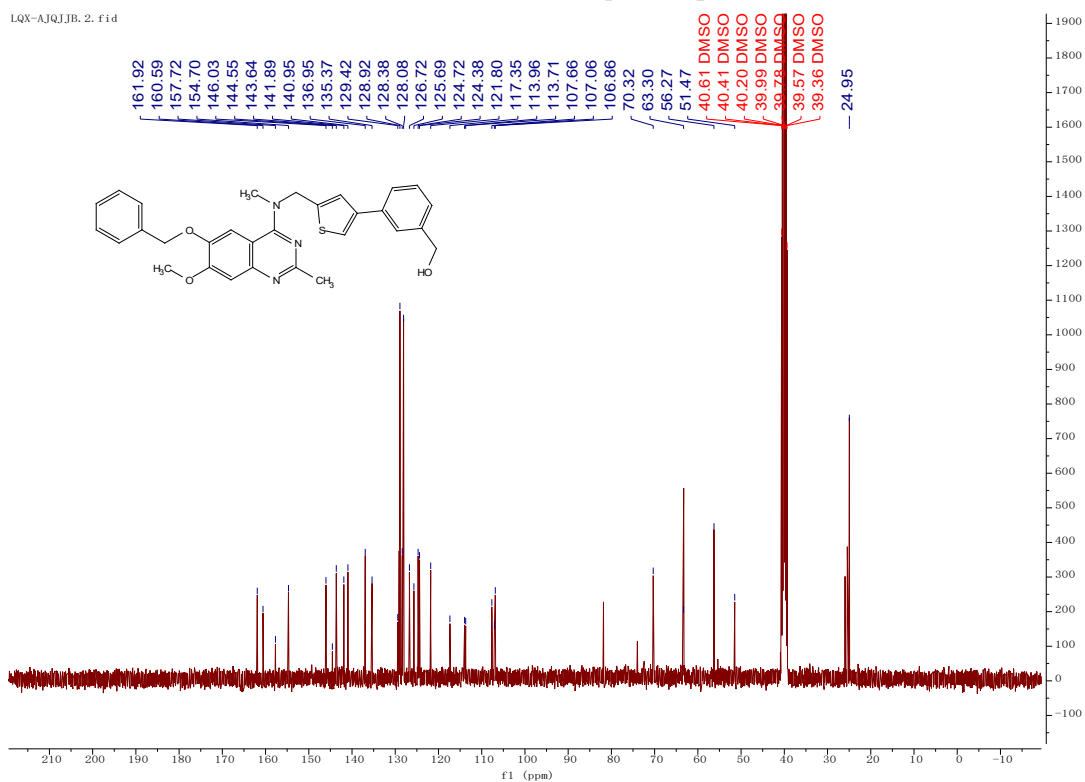

# <sup>13</sup>C NMR of compound **8q**

LQX-AJJYJB. 2. Fid

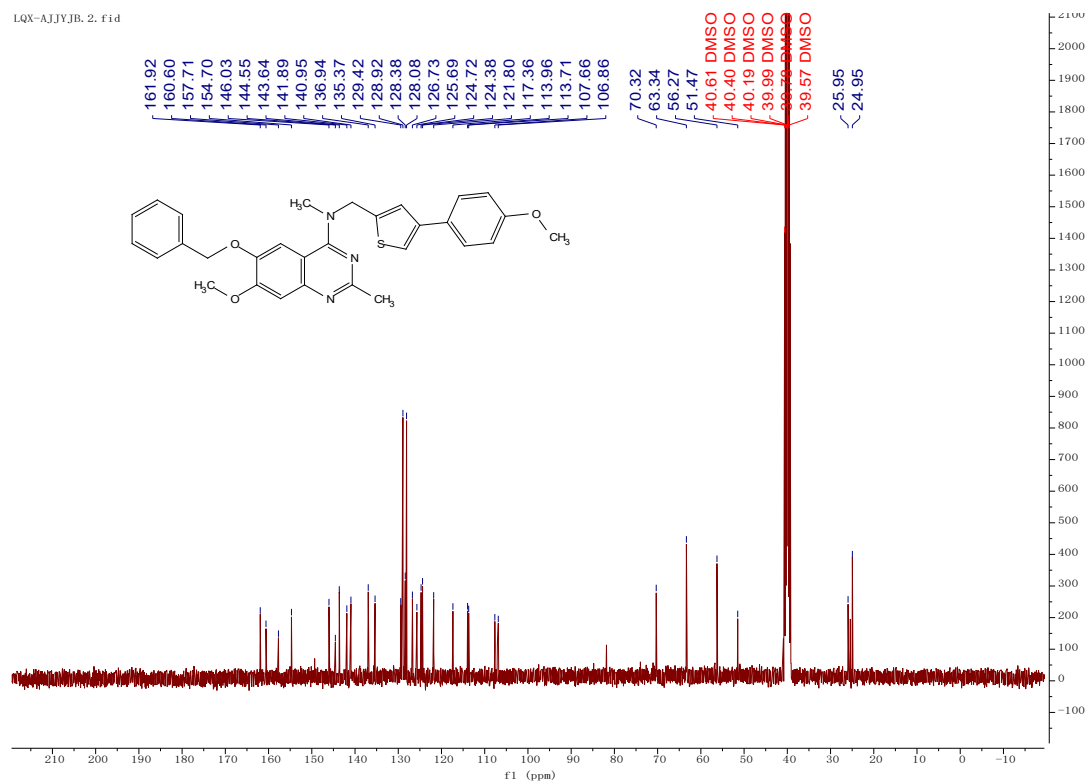

Supplement: d1nj06226c1.pdf [file d1nj06226c1.pdf]
